1 Short title: GWAS/TWAS of stomatal closure in biomass sorghum

2

3 **Corresponding author:** Andrew D. B. Leakey: 217-244-0302, [leakey@illinois.edu](mailto:leakey@illinois.edu)

4 Full title: Phenotyping stomatal closure by thermal  
5 imaging for GWAS and TWAS of water use efficiency-  
6 related genes

---

7 Charles P. Pignon<sup>1,2,3</sup>, Samuel B. Fernandes<sup>2,3</sup>, Ravi Valluru<sup>4,5</sup>, Nonoy Bandillo<sup>4,6</sup>, Roberto  
8 Lozano<sup>7</sup>, Edward Buckler<sup>7,8</sup>, Michael A. Gore<sup>7</sup>, Stephen P. Long<sup>1,2,3,9</sup>, Patrick J. Brown<sup>2,3</sup>,  
9 Andrew D. B. Leakey<sup>1,3,4</sup>

10

11 **Affiliations:**

12 <sup>1</sup>Department of Plant Biology, University of Illinois at Urbana-Champaign, Urbana, IL 61801,  
13 USA.

14 <sup>2</sup>Department of Crop Sciences, University of Illinois at Urbana-Champaign, Urbana, IL 61801,  
15 USA.

16 <sup>3</sup>Carl R. Woese Institute for Genomic Biology, University of Illinois at Urbana-Champaign,  
17 Urbana, IL 61801, USA.

18 <sup>4</sup>Institute for Genomic Diversity, Cornell University, Ithaca, NY 14853, USA.

19 <sup>5</sup>Lincoln Institute for Agri-Food Technology, University of Lincoln, LN1 3QE Lincoln, UK.

20 <sup>6</sup>Department of Plant Sciences, North Dakota State University, Fargo, ND 58105, USA.

21 <sup>7</sup>Plant Breeding and Genetics Section, School of Integrative Plant Science, Cornell University,  
22 Ithaca, NY 14853, USA

23 <sup>8</sup>United States Department of Agriculture, Agricultural Research Service (USDA-ARS) R.W.  
24 Holley Center for Agriculture and Health, Ithaca, NY 14853, USA

25 <sup>9</sup>Lancaster Environment Centre, University of Lancaster, LA1 1YX, UK.

26

27 ORCID: 0000-0002-4237-1649 (C.P.P), 0000-0001-6896-8024 (M.A.G.), 0000-0003-1332-711X  
28 (P.J.B.), 0000-0001-6251-024X (A.D.B.L)

29

30 **One sentence summary:**

31 Rapid phenotyping of 659 accessions of *Sorghum bicolor* revealed heritable stomatal responses  
32 to a decrease in light. GWAS/TWAS was used to identify candidate genes influencing traits  
33 important to WUE.

34

35 **Footnotes:**

36 The research was conceived by C.P., S.L., E.B., M.G. and A.L. Experiments were performed by  
37 C.P., P.B. and R.V.. Data was analyzed and interpreted by C.P., S.F., R.V., N.B., R.L. and A.L..  
38 C.P. and A.L. wrote the paper with input from all authors. A.L. agrees to serve as the author  
39 responsible for contact and ensuring communication.

40 This research was funded by the Advanced Research Projects Agency-Energy (ARPA-E), U.S.  
41 Department of Energy (DOE), under Award Number DE-AR0000661 and the Office of

42 Biological and Environmental Research in the DOE Office of Science (DE-SC0018277). The  
43 views and opinions of authors expressed herein do not necessarily state or reflect those of the  
44 United States Government or any agency thereof.

45

46 Current addresses:

47 Pignon C: Benson Hill, 1005 N Warson Rd, St. Louis, MO 63132

48 Brown P: Department of Plant Sciences, University of California, Davis, CA 95616, USA.

49 Author for contact: [leakey@illinois.edu](mailto:leakey@illinois.edu)

50 This manuscript is submitted as a Research Article

51 **Abstract**

52 Stomata allow CO<sub>2</sub> uptake by leaves for photosynthetic assimilation at the cost of water vapor  
53 loss to the atmosphere. The opening and closing of stomata in response to fluctuations in light  
54 intensity regulate CO<sub>2</sub> and water fluxes and are essential to maintenance of water-use efficiency  
55 (WUE). However, little is known about the genetic basis for natural variation in stomatal  
56 movement, especially in C<sub>4</sub> crops. This is partly because the stomatal response to a change in  
57 light intensity is difficult to measure at the scale required for association studies. High-  
58 throughput thermal imaging was used to bypass the phenotyping bottleneck and assess 10 traits  
59 describing stomatal conductance ( $g_s$ ) before, during and after a stepwise decrease in light  
60 intensity for a diversity panel of 659 sorghum accessions. Results from thermal imaging  
61 significantly correlated with photosynthetic gas-exchange measurements.  $g_s$  traits varied  
62 substantially across the population and were moderately heritable ( $h^2$  up to 0.72). An integrated  
63 genome-wide and transcriptome-wide association study (GWAS/TWAS) identified candidate  
64 genes putatively driving variation in stomatal conductance traits. Of the 239 unique candidate  
65 genes identified with greatest confidence, 77 were orthologs of Arabidopsis genes related to  
66 functions implicated in WUE, including stomatal opening/closing (24 genes), stomatal/epidermal  
67 cell development (35 genes), leaf/vasculature development (12 genes), or chlorophyll  
68 metabolism/photosynthesis (8 genes). These findings demonstrate an approach to finding  
69 genotype-to-phenotype relationships for a challenging trait as well as candidate genes for further  
70 investigation of the genetic basis of WUE in a model C<sub>4</sub> grass for bioenergy, food, and forage  
71 production.

72

## 73 **Introduction**

74 Water availability is a major limiting factor to agriculture worldwide (Boyer, 1982), and  
75 is predicted to become even more limiting due to rising demand for water resulting from  
76 increasing atmospheric vapor pressure deficit (VPD) with climate change (Lobell et al., 2008;  
77 WWAP, 2015; FAO et al., 2018). Greater crop water use associated with greater above-ground  
78 biomass has also been implicated in past and future increases in crop yield (Sinclair et al., 1984;  
79 Ray et al., 2013; Lobell et al., 2014; Ort and Long, 2014; Koester et al. 2016; DeLucia et al.,  
80 2019). Therefore, unless WUE is enhanced, agricultural systems in the near future will be  
81 increasingly threatened by drought, and unsustainable practices such as over-irrigation may  
82 result (DeLucia et al., 2019; Leakey et al., 2019).

83 WUE is key to terrestrial plant growth due to the inherent trade-off between net  
84 photosynthetic carbon assimilation ( $A$ ) and water loss through transpiration (Wong et al., 1979).  
85 Most leaf water and  $\text{CO}_2$  fluxes pass through stomatal pores (Kerstiens, 1996; Hetherington and  
86 Woodward, 2003). Stomatal aperture is dynamically regulated by the movement of stomatal  
87 guard cells (Assmann and Jegla, 2016), which respond to extrinsic and intrinsic signals to  
88 optimize  $\text{CO}_2$  uptake relative to water vapor loss (Medlyn et al 2011). The synchrony of stomatal  
89 opening and closing with fluctuations in photosynthetic  $\text{CO}_2$  assimilation varies within and  
90 among species, with significant consequences for intrinsic water-use efficiency ( $iWUE$ , the ratio  
91 of  $A$  to stomatal conductance to water vapor ( $g_s$ )) (Lawson and Blatt, 2014; Kaiser et al., 2015).  
92 If conditions are favorable for  $A$ , but  $g_s$  is low,  $A$  will be limited by  $\text{CO}_2$  supply. Conversely, if  $A$   
93 is low, but  $g_s$  is high, unnecessary transpiration will occur with no corresponding benefit to  $A$ ,  
94 substantially decreasing  $iWUE$ . This is important in fluctuating light environments such as field  
95 crop canopies, where the movement of clouds and leaves cause frequent and abrupt changes in  
96 photosynthetic photon flux density (PPFD) at the leaf level (Pearcy, 1990; Zhu et al., 2004; Way  
97 and Pearcy, 2012; Wang et al., 2020).

98 Generally,  $g_s$  responds an order of magnitude more slowly than  $A$  to a decline in PPFD,  
99 declining to a new steady-state over the course of several minutes (Hetherington and Woodward,  
100 2003; McAusland et al., 2016). This results in a de-synchronization of  $A$  and  $g_s$  and loss of  
101  $iWUE$ . Ensuring that  $A$  and  $g_s$  are synchronized in their response to fluctuating light, by

102 accelerating stomatal movement, could yield substantial benefits to *iWUE* of 20-30% (Lawson  
103 and Blatt, 2014). Proof-of-concept from transgenic manipulation of the stomatal light-sensing  
104 mechanism has led to accelerated stomatal movement and improved *iWUE* in fluctuating light in  
105 Arabidopsis and tobacco (Glowacka et al., 2018; Papanatsiou et al., 2019). Still, accelerating  
106 stomatal movement by breeding or biotechnology for improved *iWUE* remains an open challenge  
107 in cereal crops (Faralli et al., 2019).

108         The genetic basis for natural variation in traits describing stomatal opening/closing is  
109 poorly understood, in part because such traits are difficult to phenotype at the scale required for  
110 association studies. The response of  $g_s$  to fluctuating light is lengthy, with some species needing  
111 >30 minutes to transition from steady-state at one light intensity to another (Lawson and Blatt,  
112 2014; McAusland et al., 2016; Deans et al., 2019). The standard measurement of  $g_s$  using gas-  
113 exchange chambers or porometers requires a single instrument for each leaf, so is costly in terms  
114 of personnel and equipment. Using thermal imaging to track changes in leaf temperature  
115 resulting from stomatal movement, with the leaf warming up as stomata close due to a  
116 proportionate reduction of cooling by transpiration, provides a high throughput phenotyping  
117 method in which numerous leaves can be measured simultaneously (Jones et al., 2002; Guilioni  
118 et al., 2008; Vialet-Chabrand and Lawson, 2019). Thermal imaging has been used to monitor  
119 stomatal closure (Jones et al., 2002) and stress response (Grant et al., 2007) in a grapevine field,  
120 to identify Arabidopsis mutants with altered  $g_s$  (Merlot et al., 2002), and coupled with  
121 chlorophyll fluorescence measurements to screen Arabidopsis plants for *iWUE* (McAusland et  
122 al., 2013). In a broad validation experiment, thermal measurements predicted  $g_s$  for a range of  
123 species exposed to different experimental treatments (Grant et al., 2006). Finally, thermal  
124 imaging was used to perform high-throughput phenotyping of the response of hundreds of  
125 ecotypes of Arabidopsis to changing light and [CO<sub>2</sub>] (Takahashi et al., 2015). However, the  
126 ability of thermal imaging to produce trait estimates with sufficiently high heritability to support  
127 quantitative genetic investigation of genotype-to-phenotype relationships for stomatal  
128 opening/closing remains unclear.

129         Genome-wide association studies (GWAS) are widely used to identify the genetic basis  
130 for natural variation in agronomic, developmental, physiological and biochemical traits in plant  
131 species, including sorghum (Casa et al., 2008; Morris et al., 2013; Burks et al., 2015; Ortiz et al.,

132 2017). The benefits and limitations of the approach have been reviewed in many contexts (Liu  
133 and Yan, 2019; Tam et al., 2019; Zhou and Huang, 2019). GWAS of stomatal movement can be  
134 challenging because biophysical trade-offs can limit the extent of natural variation in the trait,  
135 and because measurements may be slow, sensitive to environmental conditions, and lack  
136 accuracy, precision or both. Together, these factors can reduce the variance that can be ascribed  
137 to genotype, i.e. reduce heritability, and constrain the size of the mapping population that can be  
138 studied, resulting in low statistical power. Recently, combining GWAS with transcriptome-wide  
139 association study (TWAS), which identifies significant associations between trait variation and  
140 RNA transcript abundance across all expressed genes in a tissue, has been shown to improve  
141 identification of genes underlying trait variation (Kremling et al., 2019).

142 This study aimed to demonstrate how phenotyping by thermal imaging could be used in  
143 conjunction with integrated GWAS/TWAS to quantify natural diversity in stomatal/opening  
144 closing and identify genotype-to-phenotype relationships in a model  $C_4$  crop. *Sorghum bicolor*  
145 ((L.) Moench) is a model species used to study photosynthesis, abiotic/biotic stress and canopy  
146 architecture, as well as applied investigations in the context of food, fuel and forage production  
147 (Paterson et al., 2009; Morris et al., 2013). It has particular importance in semi-arid conditions  
148 due to its high productivity and drought-tolerance (Regassa and Wortmann, 2014; Hadebe et al.,  
149 2017). Sorghum is an especially interesting model in which to study stomatal movement because  
150 it has fast stomatal responses to decreasing light relative to other species (McAusland et al.,  
151 2016; Pignon et al., 2021). High-throughput thermal imaging was used to measure 10 traits  
152 describing the response of  $g_s$  to a decrease in photosynthetic photon flux density (*PPFD*) in over  
153 2000 plants of 659 accessions in a sorghum association mapping population. Results were  
154 validated against photosynthetic gas-exchange measurements. Phenotypic trait correlations were  
155 used to identify general patterns in stomatal behavior. GWAS and TWAS were performed to  
156 identify phenotype to genotype associations, along with an ensemble approach combining  
157 GWAS and TWAS results using the Fisher's combined test (FCT) (Kremling et al., 2019),  
158 followed by a GO enrichment analysis. The resulting list of 239 candidate genes identified with  
159 greatest confidence was enriched in orthologs of genes implicated in stomatal and photosynthetic  
160 traits in *Arabidopsis* and maize.

161





## 163 **Results**

164 The response of  $g_s$  estimated from thermal imaging ( $g_{s\ thermal}$ ) to a reduction in  $PPFD$   
165 from 750 to 75  $\mu\text{mol m}^{-2} \text{s}^{-1}$  was measured in 659 sorghum accessions (Table 1; Fig. 1). On a  
166 subset of 64 plants,  $g_s$  estimates were also obtained from gas-exchange measurements to validate  
167  $g_{s\ thermal}$  as a proxy for  $g_s$ . Both  $g_{s\ thermal}$  and  $g_s$  predicted a similar pattern of stomatal closure  
168 upon a decrease in  $PPFD$ , sometimes followed by re-opening at low  $PPFD$  (Fig. 2). All traits  
169 derived from  $g_{s\ thermal}$  were significantly and positively correlated with their equivalents from  $g_s$   
170 ( $p < 0.005$ , Pearson's  $r$  ranging from 0.38 - 0.59, Spearman's rank-order  $\rho$  ranging from 0.29 -  
171 0.66, Fig. 3).

## 172 **Genetic variation, heritability, and trait correlations**

173 Variation among accessions was 3-fold, 10-fold, 6-fold, and 8-fold, respectively, for  
174 steady-state  $g_{s\ thermal}$  at high  $PPFD$  ( $g_{s\ light}$ ), steady-state  $g_{s\ thermal}$  at low  $PPFD$  ( $g_{s\ shade}$ ), the  
175 amplitude of decline in  $g_{s\ thermal}$  from high to low  $PPFD$  ( $g_{s\ light} - g_{s\ shade}$ ), and integrated  $g_{s\ thermal}$   
176 throughout the low- $PPFD$  period ( $g_{s\ \Sigma\ shade}$ , Table 1). For example,  $g_{s\ light}$  in accession PI552851  
177 was more than double that of accession PI267653 (Fig. 4A-B). After the decrease in  $PPFD$ ,  $g_{s\ thermal}$   
178 declined at an exponential rate ( $V_{initial}$ ), then reached a minimum ( $g_{s\ initial\ min}$ ), and the time  
179 to reach this minimum was recorded ( $t_{initial\ min}$ ). Variation among accessions was 28-fold, 9-fold,  
180 and 7-fold, respectively, for  $V_{initial}$ ,  $g_{s\ initial\ min}$ , and  $t_{initial\ min}$ , respectively (Table 1). For example,  
181 the decline of  $g_{s\ thermal}$  was faster in PI267653, which displayed a strongly negative  $V_{initial}$  and low  
182  $t_{initial\ min}$  relative to slower accessions such as PI552851 (Fig. 4A-B). Stomatal re-opening often  
183 occurred after the initial decline causing a dampened oscillation in  $g_{s\ thermal}$  during adjustment to  
184 low  $PPFD$ . The variation among accessions was 37-fold, 7-fold, and 9-fold, respectively, for the  
185 linear increase in  $g_{s\ thermal}$  ( $V_{oscillation}$ ),  $g_{s\ thermal}$  at peak stomatal re-opening ( $g_{s\ oscillation\ max}$ ) and the  
186 amplitude of oscillation ( $g_{s\ oscillation\ max} - g_{s\ initial\ min}$ ). For example, the oscillation of  $g_{s\ thermal}$  was  
187 more pronounced in NSL50717, which displayed high  $V_{oscillation}$  and high oscillation amplitude  
188 ( $g_{s\ oscillation\ max} - g_{s\ initial\ min}$ ), relative to PI660605, which showed no stomatal re-opening (Fig. 4C-  
189 D). Oscillation of  $g_{s\ thermal}$  occurred on different timescales, e.g. more protracted in PI329646  
190 than PI660630 (Fig. 4E-F). Variation in these traits among genotypes was reproducible across  
191 replicates (Fig. 4A-F).

192 Genomic heritability ( $h^2$ ) was highest (0.67-0.72) in traits describing  $g_s$  thermal at low  
193  $PPFD$ , including  $g_s$  initial min,  $g_s$  oscillation max,  $g_s$  shade, and  $g_s \Sigma$  shade (Table 1). Traits describing the  
194 speed of change in  $g_s$  thermal after a decrease in  $PPFD$  ( $V_{initial}$ ,  $t_{initial\ min}$ ) also had moderately high  
195  $h^2$  (0.67-0.68). Traits describing the oscillation in  $g_s$  thermal during stomatal re-opening at low  
196  $PPFD$  ( $V_{oscillation}$ ,  $g_s$  oscillation max -  $g_s$  initial min) had low to intermediate  $h^2$  (0.24-0.49).  $h^2$  was low  
197 (0.31) in traits describing  $g_s$  thermal at high  $PPFD$  and the amplitude of overall decline in  $g_s$  thermal  
198 from high to low  $PPFD$ :  $g_s$  light and  $g_s$  light -  $g_s$  shade, respectively.

199 All traits were correlated ( $r$  from -0.29 – 0.94) with one another ( $p < 0.05$ , Fig. 5,  
200 Supplementary Fig. S1). In particular, accessions with high  $g_s$  thermal at high  $PPFD$  also had  
201 greater overall  $g_s$  thermal at low  $PPFD$  (positive correlation of  $g_s$  light and  $g_s \Sigma$  shade,  $p < 0.0001$ ,  
202  $r = 0.58$ , Fig. 6A), took longer to adjust to the decrease in  $PPFD$  (positive correlation of  $g_s$  light and  
203  $t_{initial\ min}$ ,  $p < 0.0001$ ,  $r = 0.3$ ; positive correlation of  $g_s$  light and  $V_{initial}$ ,  $p < 0.0001$ ,  $r = 0.34$ , Fig. 6B-C),  
204 and had more pronounced stomatal re-opening at low  $PPFD$  (positive correlation of  $g_s$  light and  
205  $V_{oscillation}$ ,  $p < 0.0001$ ,  $r = 0.21$ , Fig. 6D).

## 206 GWAS, TWAS, FCT and GO enrichment analysis

207 For each  $g_s$  thermal trait, genes were initially identified as of potential interest if they were  
208 in linkage disequilibrium (LD) (Supplementary Table S1) with the top 0.1% strongest associated  
209 SNPs from GWAS (~600 genes per trait; Supplementary Table S2); among the top 1% strongest  
210 associated genes from TWAS for leaf or shoot tissues (199 and 169 genes per trait, respectively;  
211 Supplementary Table S3); or among the top 1% strongest associated genes from FCT for leaf or  
212 shoot tissues (150 genes per trait; Supplementary Table S4). In addition to individual traits,  
213 multi-trait associations were performed with two trait groups: G1) traits describing the speed of  
214 change in  $g_s$  thermal after a decrease in  $PPFD$  ( $V_{initial}$ ,  $t_{initial\ min}$ ), and G2) traits describing overall  
215 values of  $g_s$  thermal ( $g_s$  light,  $g_s$  initial min,  $g_s$  oscillation max,  $g_s$  shade,  $g_s \Sigma$  shade). The compilation of these  
216 results (Table S5) indicated that there was significant overlap in genes identified for different  $g_s$   
217 thermal traits, with 37% of genes being identified for two or more traits (Table 2).

218 Follow-up analyses were also performed to identify a subset of “higher confidence”  
219 genes, i.e. genes for which there was evidence for an association of trait variation with DNA  
220 sequence variation (GWAS) and RNA transcript abundance (TWAS), or genes identified in tests

221 from both of the two independent approaches to sampling developing leaf tissue i.e. from the 3<sup>rd</sup>  
222 *leaf* or *shoot* section containing the growing point. Therefore, genes overlapping the top hits for  
223 multiple analyses/tissues, i.e. GWAS, TWAS leaf, TWAS shoot, FCT leaf, and/or FCT shoot (n.  
224 overlaps  $\geq 2$  in Supplementary Table S5), were further investigated (Supplementary Fig. S2-S12).  
225 Across all traits, 1548 candidate genes were identified consistently across two or more of the  
226 individual tests. Taking  $V_{initial}$  as a representative trait, of the 1007 top hits, 180 were identified  
227 from at least two analyses/tissues (Fig. 7).

228 GO enrichment analysis on Arabidopsis orthologs of the “higher confidence” genes  
229 identified 153 significantly enriched biological processes (FDR-adjusted  $p < 0.05$ ), nested within  
230 34 broad categories (Supplementary Table S6). Among these, 22 categories of biological  
231 processes (e.g. *regulation of histone H3-K27 methylation*, *hydrogen peroxide metabolic process*,  
232 *cell cycle DNA replication*, *plant epidermis morphogenesis*, *lipid catabolic process* and *plant-*  
233 *type cell wall biogenesis*) were enriched by  $>2.5$ -fold (Fig. 8). A total of 239 unique genes  
234 contained within these GO categories were considered the strongest candidates to underlie  
235 variation in stomatal conductance traits studied here. A survey of the literature on their orthologs  
236 in Arabidopsis, maize and rice revealed a large proportion of genes (32 %) had functions related  
237 to stomatal opening/closing (24 genes), stomatal/epidermal cell development (35 genes),  
238 leaf/vasculature development (12 genes), or chlorophyll metabolism/photosynthesis (8 genes)  
239 (Supplementary Table S7).

240



## 242 **Discussion**

243 Stomatal responses to changes in *PPFD* influence WUE of plants in fluctuating light  
244 environments (Lawson and Blatt, 2014). This study successfully met the objectives of: (1)  
245 demonstrating how high-throughput thermal imaging can be used to rapidly phenotype variation  
246 in stomatal closure responses to *PPFD* across a diverse population of  $C_4$  plants; and (2) using that  
247 HTP data to perform an integrated GWAS/TWAS that identified a compelling set of candidate  
248 genes for further investigation of stomatal opening and closing in  $C_4$  species. Thermal  
249 measurements were validated against classical gas-exchange, and phenotypic correlations  
250 revealed relationships between steady-state (e.g.  $g_s$  *light*) and dynamic (e.g.  $V_{initial}$ ) stomatal  
251 conductance traits. Results showed substantial, heritable variation in dynamic responses of  
252 stomata to a reduction in *PPFD*. This study presents important new information on sorghum, a  
253 model system with rapid stomatal movement compared to other species (McAusland et al.,  
254 2016), and addresses a major knowledge gap that exists for  $C_4$  species, despite their agricultural  
255 and ecological importance (Edwards et al., 2010; Leakey et al., 2019).

### 256 **Validation of $g_s$ *thermal* as a high-throughput proxy for $g_s$**

257 Although dynamic  $g_s$  responses have been increasingly studied in the past few years  
258 (McAusland et al., 2016; Deans et al., 2019; Acevedo-Siaca et al., 2020; De Souza et al., 2020;  
259 Pignon et al., 2021), measurements have not yet been deployed at a scale amenable to association  
260 mapping (e.g., GWAS). Here,  $g_s$  *thermal* was a useful high-throughput proxy for  $g_s$ , enabling  
261 simultaneous measurement of 18 plants in a single imaging frame. Previous studies have  
262 reported near-perfect correlation between  $g_s$  *thermal* and  $g_s$  when it was examined globally across  
263 an entire dataset i.e. where  $g_s$  varied by more than an order of magnitude as a result of combining  
264 data from multiple *PPFD*s, species and genotypes (Spearman's rank-order  $\rho=0.96$ ) (McAusland  
265 et al., 2013). In contrast, the present study focused on testing the correlations between estimates  
266 of individual traits measured by photosynthetic gas exchange versus thermal imaging at higher  
267 throughput. For example, thermal imaging was highly significant ( $p<0.001$ ) in capturing  
268 variation in  $g_s$  measured by gas exchange at a single *PPFD* ( $\rho$  ranging from 0.29 - 0.66, Fig. 3)  
269 and this thermal estimate of  $g_s$  *shade* had a heritability of 0.70, making it suitable for association  
270 mapping. It is also notable that correlations between the two measurement approaches would  
271 have been weakened because  $g_s$  *thermal* and  $g_s$  were not measured simultaneously in the manner

272 that McAusland et al. (2013) achieved so elegantly. For example, consistency between the two  
273 approaches to  $g_s$  measurements was likely reduced by differences in measurement conditions and  
274 the immediate history of environmental conditions experienced by leaves as they moved from  
275 thermal measurements to the gas exchange chamber. Boundary layer conductance was likely  
276 lower while measuring  $g_{s \text{ thermal}}$  than  $g_s$  due to the air mixing fan used in gas-exchange equipment  
277 (Grant et al., 2006). Light quality was equal parts red/blue/green for  $g_{s \text{ thermal}}$  vs. 90% red 10%  
278 blue for  $g_s$ . This likely affected stomatal opening, which is induced by blue, and to a lesser  
279 extent, red light (Assmann and Shimazaki, 1999; Shimazaki et al., 2007; Lawson et al., 2011;  
280 Assmann and Jegla, 2016). For these reasons, the significant correlations between all traits  
281 estimated from  $g_{s \text{ thermal}}$  and their counterparts estimated from gas exchange measurements were  
282 considered a validation of the methods used.

### 283 **Sorghum shows varied, heritable stomatal responses to a decrease in PPF**

284 Within-species diversity in stomatal light responses has been documented for  $C_3$  species  
285 including Arabidopsis (Takahashi et al., 2015), poplar (Durand et al., 2019), rice (Acevedo-Siaca  
286 et al., 2020), cassava (De Souza et al., 2020) and soybean (Soleh et al., 2016). Expanding the  
287 scale of investigation to 659 accessions of sorghum revealed substantial variation within the  $C_4$   
288 model species, despite the fact that  $C_4$  species generally have lower  $g_s$  than  $C_3$  species (Taylor et  
289 al., 2010). The range of  $t_{\text{initial min}}$  shown here (1.8-13.4 minutes, Table 1) overlapped with similar  
290 measurements in sorghum (~2-8 minutes) (McAusland et al., 2016; Pignon et al., 2021), the  
291 closely related  $C_4$  grasses miscanthus and maize (~8 minutes), the  $C_3$  grass rice (~10 minutes)  
292 (McAusland et al., 2016), and the semi-aquatic rhizomatous fern *Marsilea drummondii* A. Braun  
293 (~9 minutes) (Deans et al., 2019). Some  $C_3$  dicots such as Arabidopsis and sunflower (~18  
294 minutes) were roughly comparable to the slowest accession shown here ( $t_{\text{initial min}} = 13.4$  minutes),  
295 while many other species appeared considerably slower (~30 minutes) (McAusland et al., 2016;  
296 Deans et al., 2019). The faster stomata of sorghum might be related to the unique structure of  
297 graminaceous stomata, composed of dumbbell-shaped guard cells flanked by subsidiary cells,  
298 which have been linked to rapid movement relative to other forms (Franks and Farquhar, 2007;  
299 Lawson et al., 2011; Serna, 2011; McAusland et al., 2016; Lawson and Violet-Chabrand, 2019).  
300 Stomata of  $C_4$  plants tend to be smaller and more sensitive to environmental change than their  $C_3$   
301 counterparts (Lawson et al., 2011; McAusland et al., 2016).

## 302 **Implications of natural diversity in stomatal responses to decreasing *PPFD***

303 Compared to steady-state  $g_s$  under high *PPFD*, traits describing the dynamic change in  $g_s$   
304 *thermal* after a decrease in *PPFD* had greater variability and  $h^2$ , making them more tractable targets  
305 for association studies (Table 1). Additionally, variation in traits describing the speed of change  
306 in  $g_s$  *thermal* after a decrease in *PPFD* ( $V_{initial}$ ,  $t_{initial\ min}$ ) might be leveraged to accelerate stomatal  
307 responses even in species with “fast” stomata such as sorghum, potentially improving  
308 coordination of  $g_s$  with photosynthetic carbon assimilation (*A*) and resulting in improved *iWUE*  
309 (Lawson and Blatt, 2014).

310 The relationships among traits observed across the genetic variation surveyed here are  
311 consistent with biophysical trade-offs driven by structure-functional relationships, as well as  
312 selection for trait combinations that favor carbon gain versus water savings to differing degrees  
313 in different environments. For example, the finding that accessions with greater  $g_s$  *light* took  
314 longer to adjust to a decrease in *PPFD* (Fig. 6B-C) is consistent with greater  $g_s$  *light* being  
315 associated with larger stomata and longer times for pores to close in a subset of the lines studied  
316 here (Pignon et al., 2021) and in tests of diverse species (McAusland et al., 2016). However, it is  
317 worth noting that variation in stomatal opening/closing is also associated with guard cell  
318 physiology, including ion transport processes (Lawson and Blatt 2014). Adaptation to different  
319 environments may also contribute to the observed trait correlations, with high  $g_s$  *light* and slow  
320 stomatal closure working in concert to favor *A* and rapid growth in environments where water is  
321 not limiting. In contrast, low  $g_s$  *light* and rapid stomatal closure combine to prioritize water-use  
322 efficiency and conservative but sustained growth in water-limited environments (Vico et al.,  
323 2011). Since more rapid stomatal closure after a decrease in *PPFD* would increase *iWUE*, there  
324 is significant interest in identifying more genes underpinning structural and functional  
325 components of stomatal movements, as well as their interactions with steady-state gas exchange  
326 and leaf development and physiology more broadly (Lawson and Blatt 2014).

## 327 **GWAS/TWAS identifies genes enriched in stomatal, leaf developmental and** 328 **photosynthetic functions**

329 Gene candidates putatively associated with genetic variation in stomatal closure in  
330 sorghum were identified using GWAS and TWAS integrated with FCT, followed by GO  
331 enrichment analysis. This approach has identified known causal variants more efficiently than



332 GWAS and TWAS alone (Kremling et al. 2019), while also increasing the consistency in results  
333 observed when testing was repeated across different conditions (Ferguson et al. 2020). The  
334 present study reinforced these prior reports, with an order of magnitude more genes being  
335 consistently identified by FCT versus TWAS across the two independent tissue sampling  
336 strategies used (Table S5). GO enrichment analysis of the Arabidopsis orthologues of these  
337 genes revealed 22 GO biological processes that were significantly and >2.5-fold enriched  
338 (Supplementary Table S6, Fig. 8). The 239 genes belonging to these 22 categories were selected  
339 as the greatest confidence candidate genes (Fig. 8; Supplementary Table S7). A large proportion  
340 (32%) of these genes have orthologs in Arabidopsis, maize or rice that are already implicated in  
341 regulating traits related to stomata or WUE. While it is unlikely that such enrichment would  
342 occur by random chance, the function of the genes identified here will require confirmation by  
343 follow-up reverse genetic studies of transgenic or mutant plants.

344 Twenty three orthologs of genes implicated in signaling, metabolism or transporters in guard  
345 cells belong to enriched GO terms including *lipid catabolic process*, *hydrogen peroxide*  
346 *metabolic process*, *response to disaccharide* and *response to heat* (Supplementary Table S7). For  
347 example, loss of ascorbate peroxidase 1 (APX1) and the Respiratory burst oxidase homolog  
348 protein F (RBOHF) influence redox oxygen species (ROS) to alter stomatal responses to light,  
349 [CO<sub>2</sub>] or abscisic acid (ABA; Pnueli et al., 2003; Chater et al., 2015; Sierla et al., 2016).  
350 Meanwhile, the MYB60 transcription factor is required for light induced opening of stomata in  
351 Arabidopsis. It is expressed exclusively in guard cells, with expression increasing and decreasing  
352 in accordance with conditions that promote stomatal opening and closing, respectively  
353 (Cominelli et al., 2005). Phospholipase D $\alpha$ 1 (PLD $\alpha$ 1) and its lipid product phosphatidic acid  
354 impact ABA-induction of ROS production and stomatal closure (Zhang et al., 2009). Mutants of  
355 ABC transporter G family member 40 (ABCG40) shut more slowly in response to ABA (Kang et  
356 al. 2010), while its sorghum ortholog was variously associated with 5 different  $g_s$  thermal traits  
357 in GWAS, TWAS and FCT tests.

358         Recently, lipid metabolism of guard cells was discovered to be important as an energy  
359 source for light-induced stomatal opening (McLachlan et al., 2016). Five sorghum genes  
360 associated with variation in  $g_s$  thermal traits were orthologs of genes involved in triacyl glyceride  
361 mobilization and expressed in guard cells of Arabidopsis (Enoyl-CoA delta isomerase 1 and 3,



362 ECI1 and ECI3; peroxisomal fatty acid beta-oxidation multifunctional protein, MFP2; Acyl-  
363 coenzyme A oxidase 2 and 4, ACX2 and ACX4; McLachlan et al., 2016). Notably, Wrinkled1, a  
364 transcription factor that regulates metabolic genes in a manner that promotes carbon allocation to  
365 fatty acid synthesis, was also identified (Cernac and Benning 2004). Therefore, a significant  
366 proportion of the highest confidence candidate genes identified by the integrated GWAS/TWAS  
367 are plausibly involved in signaling, metabolism and transport functions in guard cells. Further  
368 study will be needed to determine if the candidate genes identified here play specific roles in  
369 stomatal closure, or if the associations observed in this study are partly a product of the strong  
370 correlations between rates of stomatal opening and closing (Lawson and Blatt 2014). Current  
371 understanding of lipid metabolism guard cells would seem to suggest the latter option is more  
372 likely, but this area of study is still relatively nascent.

373         The functions of orthologs of the highest confidence sorghum candidate genes are also  
374 consistent with the importance of structure-function relationships to the speed of stomatal  
375 opening and closing. Thirty five orthologs of genes implicated in stomatal or epidermal cell  
376 patterning belong to enriched GO terms including *plant epidermis morphogenesis*, *cell cycle*  
377 *DNA replication*, *plant-type cell wall biogenesis*, and *plastid organization* (Supplementary Table  
378 S7). Arabidopsis genes known to impact stomatal development or patterning which had sorghum  
379 orthologs found in the highest confidence candidates for  $g_s$  *thermal* traits included: the Mitogen-  
380 activated protein kinase kinase kinase YODA (Bergmann et al., 2004), the FAMA bHLH-type  
381 transcription factor (Ohashi-Ito and Bergmann 2006), the cyclin-dependent kinase CDKB1;1  
382 (Boudolf et al., 2004), the phytochrome interacting factor 1 (PIF1, Klermund et al., 2016),  
383 somatic embryogenic receptor kinase 1 (SERK1, Meng et al. 2015), DNA-directed RNA  
384 polymerase II subunit 2 (Chen et al., 2016), the chromatin regulator Enhanced Downy Mildew 2  
385 (EDM2, Wang et al., 2016), Protein Phosphatase 2A (Bian et al., 2020), GATA, NITRATE-  
386 INDUCIBLE, CARBON METABOLISM-INVOLVED (GNC, Klermund et al., 2016), the extra-  
387 large GTP-binding protein (XLG3, Chakravorty et al., 2015), and the ARF guanine-nucleotide  
388 exchange factor GNOM (Le et al., 2014). Focusing on grasses, SOBIC.010G277300 shares 96 %  
389 predicted protein sequence homology with GRMZM2G057000 in maize. The *nana plant2* (na2)  
390 mutant of this gene displays alterations in brassinosteroid synthesis and the morphology of  
391 stomatal complexes (Best et al., 2016). Similarly, SOBIC.004G116400 shares 74 % predicted

392 protein sequence homology with Os02g15950 (ERECT PANICLE 3, EP3) in rice. Loss of  
393 function mutants of EP3 have smaller stomata, which appeared to drive reductions in  $g_s$  and  $A$   
394 (Yu et al., 2015). Given the substantial evidence for links between gas exchange, stomatal  
395 complex size and stomatal density (Lawson and Blatt 2014; Xie et al., 2020), there is potential  
396 for variations in the sequence and expression of these genes to drive variation in the  $g_s$  *thermal*  
397 traits measured in this study. A number of other genes identified by the integrated  
398 GWAS/TWAS have been implicated in the development of epidermal cells in general  
399 (Supplementary Table S7). Cross talk between development pathways for stomata and other  
400 types of epidermal cells (Kim and Dolan 2011, Raissig et al., 2016) creates the opportunity for  
401 such genes to influence  $g_s$  and its response to PPFD.

402 Finally, a smaller number of sorghum genes identified in this study have orthologs known  
403 to influence overall leaf development/vasculature (9 genes) or chlorophyll/photosynthesis (7  
404 genes) (Supplementary Table S7). Leaf vasculature determines the hydraulic capacity of the leaf  
405 to deliver water that eventually diffuses out of the leaf as vapor. Consequently, strong traits  
406 associations between leaf hydraulics and stomata have been described in a range of contexts  
407 (Sack et al., 2003; Bartlett et al., 2016). In that vein, it is plausible that genes known to alter  
408 vascular development via effects on polyamine metabolism (5'-methylthioadenosine  
409 nucleosidase, MTN1, Waduwara-Jayabahu et al., 2012), glucuronoxylan synthesis (Beta-1,4-  
410 xylosyltransferase, IRX9, Pena et al., 2007) and transcriptional regulation (DEFECTIVELY  
411 ORGANIZED TRIBUTARIES 5, DOT5, Petricka et al., 2008) might be associated with  
412 variation in  $g_s$  *thermal* traits. Similarly, identification of genes involved in photosynthesis may  
413 reflect the tight linkage between  $A$  and  $g_s$ , which is observed in many plant species and is  
414 particularly strong in sorghum (Leakey et al., 2019). QTL for traits related to  $A$  and  $g_s$  often  
415 overlap, including in sorghum (Ortiz et al., 2017). When compared to other species, sorghum  
416 shows exceptional coordination between  $g_s$  and  $A$  following decreases in *PPFD*, driven by rapid  
417 responses in  $g_s$  (McAusland et al., 2016). Among diverse sorghum accessions, there is significant  
418 covariation between the responses of  $A$  and  $g_s$  following decreases in *PPFD*, i.e. accessions with  
419 more rapid declines in  $A$  also have more rapid declines in  $g_s$ , and vice-versa (Pignon et al. 2021).  
420 Most notable was the identification of the sorghum Rubisco Activase (RCA) by GWAS, TWAS  
421 and FCT across 8 different  $g_s$  *thermal* traits (Supplementary Table S7). RCA encodes an enzyme

422 that plays a key role in activating Rubisco to perform the key step in photosynthetic CO<sub>2</sub>  
423 assimilation (Portis 2003), and which is known to limit the rate of photosynthetic induction after  
424 an increase in PPFD (Percy 1990). Along with a number of the results described above, this  
425 opens the possibility that phenotyping only stomatal closure may have facilitated identification  
426 of associations between genotype or gene expression and both stomatal opening and closing, as a  
427 result of the two aspects of stomatal movement being so tightly linked. If functional validation of  
428 candidate genes supports that notion, then considerable time can be saved when collecting  
429 phenotypic data.

## 430 **Conclusion**

431 This study demonstrates how high-throughput phenotyping by thermal imaging can be  
432 used to assess genetic variation in stomatal closure after a decrease in PPFD at a scale suitable  
433 for association mapping. Integrated GWAS/TWAS and FCT was then applied to identify a set of  
434 candidate genes, which were enriched in orthologs of Arabidopsis, maize and rice genes  
435 involved in stomatal opening/closing, epidermal patterning, leaf development and  
436 photosynthesis. This is important proof of concept for methods to break the phenotyping  
437 bottleneck for a trait that is important to plant productivity and sustainability but has until now  
438 been intractable as a target for study by quantitative genetics. The method described here could  
439 also be applied to other species from a variety of plant functional types or grown in different  
440 environments to assess G×E of stomatal traits. In addition, the study provides new knowledge of  
441 trait variation and underlying candidate genes in an important C<sub>4</sub> model crop, which is notable  
442 for the speed of its stomatal opening/closing. This lays the foundation for future studies to  
443 establish gene function and potentially improve crop performance.

444

445

## 446 **Materials and methods**

### 447 **Physiology measurements**

#### 448 *Plant material and growing conditions*

449 A random subset of 659 accessions was selected from the biomass sorghum diversity  
450 panel at the University of Illinois at Urbana-Champaign, as previously described (Valluru et al.,  
451 2019). Accession names are provided in Supplementary Table S8. Plants were grown from seed  
452 in flats (3x6 sets of 281 mL inserts) containing a peat/bark/perlite-based growing medium  
453 (Metro-Mix 900; Sun Gro Horticulture, Agawam, MA, USA) and supplemented with 1 mL slow  
454 release 13-13-13 fertilizer (Osmocote Classic, Everris NA, Inc., Dublin, OH, USA). One  
455 accession, PI147837, was included in each flat to identify spatial and temporal variation in  
456 measurements. Three seeds/insert were planted, then thinned to 1 seedling/insert. Flats were  
457 watered regularly to field capacity and grown in a greenhouse maintained at 27 °C day/25 °C  
458 night, with supplemental lighting to ensure minimum light intensity of 90 W m<sup>-2</sup> during a 13 h  
459 day. n=3-4 plants were assessed per accession.

#### 460 *Experimental conditions and leaf temperature measurement*

461 Once the fourth leaf had fully expanded, as evidenced by ligule emergence, plants were  
462 transferred to a growth cabinet overnight (Model PCG20, Conviron, Winnipeg, MB R3H 0R9,  
463 Canada). Cabinets were maintained at 14 h/10 h day/night cycle under 1200 μmol photons m<sup>-2</sup> s<sup>-1</sup>  
464 PAR, 30 °C daytime/25 °C nighttime temperature, and 75% RH. On the day of measurement,  
465 the fourth leaf of each plant was laid flat across a frame to standardize leaf angle and incident  
466 light interception (Supplementary Fig. S13). This presented a 4 cm length of the mid-leaf for  
467 measurement. Leaves were not detached from plants. Dry and wet reference materials were  
468 prepared as in McAusland et al. (2013) to correct for the effects of net isothermal radiation and  
469 VPD, respectively (Guilioni et al., 2008). A thin coating of petroleum jelly was applied over 1  
470 cm of abaxial and adaxial sides of leaves, providing a dry reference unique to each leaf. Two  
471 sections of filter paper, moistened by a water reservoir, were used as a wet reference.

472 Flats of 18 plants were transferred to a second growth cabinet with conditions identical to  
473 the first cabinet, except that light was provided by a 20 x 20 cm LED panel providing equal-parts  
474 blue, red and green light, with a combined incident photon flux of 750 μmol m<sup>-2</sup> s<sup>-1</sup> at the leaf

475 level (LED Light Source SL 3500, Photon Systems Instruments, Brno, Czech Republic). An  
476 infrared camera (Thermo Gear Model G100, Nippon Avionics CO., Ltd., Tokyo, Japan) was  
477 placed 0.5 m above the leaves without obstructing the light source. Incident photon flux was  
478 maintained at  $750 \mu\text{mol m}^{-2} \text{s}^{-1}$  for 40 minutes, and then reduced by 90% for an additional 60  
479 minutes. Images were recorded every 6 seconds, with emissivity=0.95 (Jones et al., 2002). The  
480 cabinet's PAR sensor was used to evaluate spatial heterogeneity of incident photon flux, which  
481 was contained to  $\pm 6\%$  variation across the measured area.

#### 482 *Image analysis and stomatal conductance estimation*

483 Analysis of thermal images was performed in ImageJ (ImageJ1.51j8, NIH, USA).  
484 Sections of leaf and reference materials of each image were hand-selected to derive profiles of  
485 temperature vs. experimental time. Leaf and reference temperatures were used to calculate  $g_{s \text{ thermal}}$ :  
486

$$487 \quad g_{s \text{ thermal}} = (T_{\text{dry}} - T_{\text{leaf}})/(T_{\text{leaf}} - T_{\text{wet}}) \quad (1)$$

488 where  $T_{\text{leaf}}$ ,  $T_{\text{dry}}$ , and  $T_{\text{wet}}$  are temperatures of the leaf, dry and wet references,  
489 respectively.  $g_{s \text{ thermal}}$  is theoretically proportional to  $g_s$  given constant environmental conditions  
490 (Jones, 1999; Jones et al., 2002; Grant et al., 2006; Guilioni et al., 2008; McAusland et al.,  
491 2013). Air RH and temperature were controlled by the growth cabinet and assumed constant  
492 across all leaf and reference surfaces. Since the cabinet was designed to deliver a uniform  
493 airflow, and replicate plantings were randomly positioned to avoid systematic spatial variation,  
494 boundary layer conductance was also assumed constant. Differences in  $g_{s \text{ thermal}}$  between leaves  
495 and over time were therefore attributed to  $g_s$ .

#### 496 **Analysis of $g_{s \text{ thermal}}$ profiles**

497 Several traits were derived from profiles of  $g_{s \text{ thermal}}$  vs. experimental time:  $g_{s \text{ light}}$ ,  $g_{s \text{ shade}}$ ,  
498  $g_{s \Sigma \text{ shade}}$ ,  $g_{s \text{ initial min}}$ ,  $g_{s \text{ oscillation max}}$ ,  $t_{\text{initial min}}$ ,  $V_{\text{initial}}$ , and  $V_{\text{oscillation}}$ . A graphical description of these  
499 traits is given in Fig. 1. After the decrease in *PPFD*,  $g_{s \text{ thermal}}$  declined as stomata closed, often  
500 followed by an oscillation in  $g_{s \text{ thermal}}$  as stomata re-opened and then closed again.  $g_{s \text{ light}}$  and  $g_{s \text{ shade}}$   
501 were the average of  $g_{s \text{ thermal}}$  from  $t=-5$  to 0, and from  $t=52$  to 60 minutes, respectively. These  
502 gave steady-state  $g_{s \text{ thermal}}$  at *PPFD* of 750 and  $75 \mu\text{mol m}^{-2} \text{s}^{-1}$ , respectively.  $g_{s \Sigma \text{ shade}}$  was the area  
503 beneath the curve following the *PPFD* change, i.e. from  $t=0$  to 60 minutes.  $g_{s \text{ initial min}}$  was the

504 minimum of  $g_{s\ thermal}$  reached immediately after the decrease in  $PPFD$ .  $g_{s\ oscillation\ max}$  was the  
505 maximum of  $g_{s\ thermal}$  reached during the stomatal re-opening phase. The time at which  $g_{s\ thermal}$   
506 reached 110% of  $g_{s\ initial\ min}$  was recorded as  $t_{initial\ min}$ . The amplitude of the overall change in  $g_s$   
507  $thermal$  from high to low  $PPFD$  was  $(g_{s\ light} - g_{s\ shade})$ , and the amplitude of oscillation in  $g_{s\ thermal}$  at  
508 low  $PPFD$  was  $(g_{s\ oscillation\ max} - g_{s\ initial\ min})$ .

509  $V_{initial}$  was derived from non-linear regression (PROC NLIN, SAS v9.4; SAS Institute,  
510 Cary, NC, USA) as the exponential rate of decline of  $g_{s\ thermal}$  from  $t = -0.1$  minutes to  $t = t_{initial\ min}$ :

$$511 \quad g_{s\ thermal} = a + b * e^{(V_{initial} * time)} \quad (2)$$

512 here  $b$  and  $a$  give estimates of  $g_{s\ thermal}$  at  $t = -0.1$  minutes and  $t = t_{initial\ min}$ , respectively, and a more  
513 negative  $V_{initial}$  indicates a more rapid decline in  $g_{s\ thermal}$ .  $V_{oscillation}$  was derived from linear  
514 regression (PROC GLM, SAS v9.4) as the linear slope of  $g_{s\ thermal}$  vs. time during stomatal re-  
515 opening at low  $PPFD$ . A more positive  $V_{oscillation}$  indicates a more rapid stomatal re-opening.

#### 516 *Validation of $g_{s\ thermal}$ with gas-exchange measurements*

517 Validation of  $g_{s\ thermal}$  as a proxy for  $g_s$  was obtained on a subset of 64 plants. After  $g_s$   
518  $thermal$  measurements were completed, plants were placed back in the first growth cabinet. The  
519 leaf section previously used for  $g_{s\ thermal}$  measurements was placed in the cuvette of a portable  
520 gas-exchange system incorporating infra-red  $CO_2$  and water vapor analyzers (LI-COR 6400; LI-  
521 COR, Inc., Lincoln, NE USA). Incident  $PPFD$  was set to  $750\ \mu\text{mol m}^{-2}\ \text{s}^{-1}$ ,  $[CO_2]$  to 400 ppm,  
522 and leaf-to-air water vapor pressure deficit maintained  $<2$  kPa.  $PPFD$  was 10% blue and 90%  
523 red light provided by integrated red and blue LEDs. The  $g_{s\ thermal}$  measurement protocol was  
524 replicated, i.e. initial  $PPFD$  was maintained for 40 minutes, then reduced by 90% for an  
525 additional 60 minutes, with  $g_s$  logged every 5 seconds (von Caemmerer and Farquhar, 1981).  
526 Pearson's correlation ( $r$ ) at  $p=0.05$  threshold, along with Spearman's rank-order correlation ( $\rho$ )  
527 were tested between equivalent stomatal conductance traits derived from  $g_{s\ thermal}$  and  $g_s$  using R  
528 3.6.1 (R Core Team, 2017).

529 When comparing  $g_{s\ thermal}$  measurements to this validation data, an anomalous spike in  $g_s$   
530  $thermal$ , reaching up to twice the steady-state high- $PPFD$   $g_{s\ thermal}$ , was consistently recorded from  
531  $t=0$  to 0.9 minutes (Fig. 1). This was likely due to the different radiative properties of the white

532 wet reference and the green leaf and dry reference. Therefore,  $g_{s\text{ thermal}}$  measurements from  $t=0$  to  
533 0.9 minutes were discarded.

#### 534 *Model development for best linear unbiased predictors (BLUPs)*

535 A linear mixed model was used to account for spatial and temporal variation using the  
536 ASReml-R package (Butler et al., 2009). The best linear unbiased predictors (BLUPs) were  
537 obtained for all accessions and traits and were used for subsequent analysis (Supplementary  
538 Table S8). The most appropriate model for each trait was chosen in two steps. First, fixed effects  
539 with a Wald statistics  $p$ -value  $> 0.05$  were excluded from the model. Subsequently, the Akaike  
540 information criterion (AIC) was used to select random effects variables and residual variance-  
541 covariance structures for each trait. The full model was:

$$542 \quad y = X\beta + Z_f f + Z_l l + Z_g g + \xi \quad (3)$$

543 where  $y$  is the vector of phenotypes,  $\beta$  is a vector of fixed effects including the intercept, a  
544 blocking effect, and a cubic smoothing splines terms for leaf position and time of measurement,  
545 with design matrix  $X$ . Here the block term refers to three discrete periods throughout the  
546 experiment where the LED light had to be repaired and repositioned within the measurement  
547 cabinet. The vector  $f$  is the vector of random effects of “flat” within block with  
548  $f \sim MVN(0, \sigma_{f/r}^2 I_{f/r})$  and design matrix  $Z_f$ . Here the term “flat” refers to a sequential flat  
549 number to account for temporal variation between measured flats of plants. The vector  $l$  is the  
550 vector of random effects of the interaction between row leaf position and column leaf position  
551 with  $l \sim MVN(0, \sigma_l^2 I_l)$  and design matrix  $Z_l$ . The vector  $g$  is the vector of random genotypic  
552 effects of accessions with  $g \sim MVN(0, \sigma_g^2 I_g)$  and design matrix  $Z_g$  and  $\xi$  is the vector of residuals  
553 with distribution  $\xi \sim MVN(0, R \otimes I_{f/r} \oplus I_r)$ . The matrix  $R = \sigma_\xi^2 [AR1 \otimes AR1]$  represents the  
554 Kronecker product of first-order autoregressive processes across row and column plant  
555 positioning within a flat, respectively, and  $\sigma_\xi^2$  is the spatial residual variance. The matrices  $I_{f/r}$ ,  
556  $I_g$ ,  $I_l$  and  $I_r$  are the identity matrices of the same dimensions as “flat” within block, genotypic  
557 effects, row leaf position and column leaf position interaction effect, and block, respectively.  
558 Outliers were removed following method 2 of (Bernal-Vasquez et al., 2016), and the Box-Cox  
559 power transformation was used on traits with non-normal residuals.



560 BLUPs were obtained for all accessions and each trait and added to the grand mean for  
561 GWAS and TWAS. Genetic and residual variances estimated from the null GWAS model were  
562 used to calculate genomic heritability ( $h^2$ ) as the ratio of genetic variance over phenotypic  
563 variance (de los Campos et al., 2015). Phenotypic correlations between all traits were tested  
564 using Pearson's correlation ( $r$ ) at  $p=0.05$  threshold using `cor.mtest()` function in package `corrplot`  
565 (Wei and Simko, 2017).

## 566 **Genomic data collection for GWAS and TWAS**

### 567 *Genotypic data*

568 Genotyping was performed as previously reported (dos Santos et al., 2020). Briefly, DNA  
569 from dark-grown etiolated seedling tissue was extracted and placed in 96-well plates following  
570 CTAB protocol (Doyle and Doyle, 1987). The genotyping was done using two pairs of  
571 restriction enzymes, PstI-HF/HinP1I and PstI-HF/BfaI (New England Biolabs, Ipswich, MA,  
572 USA) with the genotyping-by-sequencing (GBS) protocol (Elshire et al., 2011; Morris et al.,  
573 2013). Tag alignment was done with Bowtie2 (Langmead and Salzberg, 2012) using the  
574 *Sorghum bicolor* genome v3.1 ([www.phytozome.jgi.doe.gov](http://www.phytozome.jgi.doe.gov)). SNPs were identified using the  
575 TASSEL3 GBS pipeline (Glaubitz et al., 2014). Reads that did not perfectly match a barcode and  
576 restriction site were discarded. After barcode trimming, all unique 64 bp sequences present >9  
577 times in the dataset and that mapped uniquely to the sorghum genome were selected as "master  
578 tags." These were compared to tags in each individual at each genomic address to identify SNPs.  
579 SNPs with >95% missing data or minor allele frequency (MAF)<5% were discarded.

580 A HapMap of 239 whole-genome-resequenced sorghum accessions containing 5.5M  
581 biallelic phased SNPs with MAF>0.01 (Valluru et al., 2019), was used as a reference panel to  
582 impute the GBS data. GBS markers were filtered to only consider markers that were also present  
583 in the HapMap. Beagle 4.1 (Browning and Browning, 2016) was used under GT mode with Ne  
584 set to 150,000, window=60,000 SNPs, and overlap=4,000 SNPs. After imputation, markers with  
585  $AR2 < 0.3$  were removed, resulting in 2,457,023 SNPs. LD pruning using PLINK (Chang et al.,  
586 2015) eliminated markers in high LD ( $r^2 > 0.9$ ) within 50kb windows. The final dataset consisted  
587 of 422,897 SNPs.



## 588 *Gene expression data*

589 186 sorghum accessions were grown for 3'RNAseq measurement. Environmental  
590 conditions were: 12 h/12 h day/night cycle under  $500 \mu\text{mol m}^{-2} \text{s}^{-1}$  PAR, 25 °C daytime/23 °C  
591 nighttime temperature, and 75% RH. 2 cm of shoot and leaf tissues were sampled at 3<sup>rd</sup> leaf  
592 stage. Samples were processed according to (Kremling et al., 2019). Briefly, RNA was extracted  
593 using TRIzol (Invitrogen) with Direct-zol columns (Zymo Research), and 3' RNA-seq libraries  
594 were prepared robotically from 500 ng total RNA in 96-well plates on an NXp liquid handler  
595 (Beckman Coulter) using QuantSeq FWD kits (Lexogen) according to the manufacturer's  
596 instructions. Libraries were pooled to 96-plex and sequenced with 90 nucleotide single-end reads  
597 using Illumina TruSeq primers on an Illumina NextSeq 500 with v2 chemistry at the Cornell  
598 University Sequencing facility.

599 The first 12 bp and Illumina Truseq adapter remnants were removed from each read using  
600 Trimmomatic version 0.32, following kit marker instructions. The splice-aware STAR aligner  
601 v.2.4.2a was used to align reads against the sorghum v3.1.1 reference genome annotations,  
602 allowing a read to map in at most 10 locations (-outFilterMultimapNmax 10) with at most 4%  
603 mismatches (-outFilterMismatchNoverLmax 0.04), while filtering out non-canonical intron  
604 motifs (-outFilterIntronMotifs RemoveNoncanonicalUnannotated). Default settings from STAR  
605 v.2.4.2a aligner were used to obtain gene-level counts (--quantModel GeneCounts) from the  
606 resulting BAM files.

## 607 **GWAS, TWAS and FCT**

608 Traits went through an additional normal quantile transformation, then single and multi-  
609 trait associations were performed as in (Zhou and Stephens, 2014). Two groups of multi-trait  
610 models were considered: G1) traits describing the speed of change in  $g_s$  thermal after a decrease in  
611 *PPFD* ( $V_{initial}$ ,  $t_{initial\ min}$ ), and G2) traits describing overall values of  $g_s$  thermal ( $g_s$  light,  $g_s$  initial min,  $g_s$   
612 *oscillation max*,  $g_s$  shade,  $g_s \Sigma$  shade). Both groups of traits went through a step of multivariate outlier  
613 removal (Filzmoser et al., 2005) performed before running GWAS and TWAS.

614 GEMMA (Zhou and Stephens, 2012) was used for single and multivariate GWAS (Zhou  
615 and Stephens, 2014). Population structure was accounted for by using principal components  
616 (PCs) as fixed effects. Based on the Scree plot, 4 PCs obtained from PLINK (Chang et al., 2015)

617 using the full SNP dataset (i.e. not LD-pruned) were included in all models. Relatedness was  
618 controlled for by a kinship matrix obtained from TASSEL 5 (Bradbury et al., 2007) using the  
619 default method (Endelman and Jannink, 2012).

620 TWAS was tested in developing leaf and shoot tissues with genes expressed in at least  
621 half of tested plants. Analyses were implemented in R 3.3.3 (R Core Team, 2017) with the *lm*  
622 function used for single-trait TWAS and the MANOVA function for multi-trait TWAS. Similar  
623 to (Kremling et al., 2019), 29 Peer factors (Stegle et al., 2010) and five multidimensional scaling  
624 factors were used as covariates.

625 An ensemble approach combining GWAS and TWAS results was performed using the  
626 Fisher's combined test (FCT) (Kremling et al., 2019). Briefly, to integrate both the results from  
627 GWAS and TWAS, each SNP in the top 10% of GWAS analysis was assigned to the nearest  
628 gene. The *p*-values of genes not tested in the TWAS (genes expressed in less than half of tested  
629 plants) were set to one. The GWAS and TWAS *p*-values for each gene were combined using  
630 Fisher's combined test in *metap* package in R, producing Fisher's combined *p*-values.

### 631 *Candidate gene analysis*

632 Results of GWAS, TWAS and FCT were used to identify potential candidate genes  
633 driving variation in traits. A threshold set at the 0.1% lowest *p*-values was used to identify  
634 candidates for each SNP-trait association, i.e., 423 marker associations per trait. This threshold  
635 was chosen to focus the analysis on a minimum number of large-effect variants and to limit the  
636 number of false positives. PLINK (Chang et al., 2015) was used to calculate LD blocks with  
637 option `--blocks` and a window of 200 kb and default values for D-prime's confidence interval  
638 (0.7;0.98) (Supplementary Table S1). Genes within these LD blocks were compiled from the  
639 Phytozome database for *Sorghum bicolor* v3.1.1 (Goodstein et al., 2012). Similarly, the top 1%  
640 most strongly associated genes from TWAS and FCT were ascertained for each trait and tissue.  
641 Genes were selected for further analysis if they were identified by more than one test of  
642 phenotype-genotype associations, i.e. they overlapped the top hit for several analyses/tissues  
643 (e.g. overlapping top hits for both GWAS and TWAS leaf). The Arabidopsis orthologs of these  
644 genes were collected with INPARANOID (Remm et al., 2001) and used for GO term enrichment  
645 analysis in biological function (GO Ontology database DOI: 10.5281/zenodo.4081749 Released

646 2020-10-09) (Ashburner et al., 2000; Carbon et al., 2019; Mi et al., 2019). PANTHER  
647 overrepresentation test was used with Fisher's test and FDR-adjusted  $p$ -values, with significance  
648 declared at  $\alpha < 0.05$ . GO biological processes significantly and  $> 2.5$ -fold enriched were further  
649 considered, and the genes contained within these GO categories were considered the strongest  
650 candidates to underlie variation in stomatal conductance traits.

651

## 652 **Supplementary material**

653 Supplementary Table S1: LD blocks containing the top 0.1% SNPs from GWAS. The  
654 chromosome, upper and lower threshold (bp) for each LD block is also given.

655 Supplementary Table S2: Top 0.1% strongest GWAS results for each trait, including SNP  
656 chromosome and position, marker  $R^2$  and minor allele effect size.

657 Supplementary Table S3: TWAS results from each tissue and trait, including chromosome  
658 position and  $R^2$  for each gene.

659 Supplementary Table S4: FCT results from each tissue and trait, including the GWAS and  
660 TWAS  $p$ -values taken from Supplementary Tables S2-3 and used to calculate an FCT  $p$ -value for  
661 each gene.

662 Supplementary Table S5: Summary of genes appearing in the top results for GWAS, TWAS leaf,  
663 TWAS shoot, FCT leaf and FCT shoot. An “x” identifies genes present in the top associations  
664 for an analysis/tissue. The number of analyses that a gene overlapped the top hits for is also  
665 shown, ranging from 1 to 5, where n. overlaps=1 indicates a gene was in the top hits for a single  
666 analysis/tissue for a given trait, and n. overlaps=5 indicates a gene was in the top hits for all  
667 analyses/tissues for a given trait. The Arabidopsis ortholog of each gene is also given.  
668 Arabidopsis orthologs of genes that had n. overlaps of at least 2 were further investigated by GO  
669 enrichment analysis (Supplementary Table S6). Genes that were present in a GO enrichment  
670 category that was significantly and >2.5-fold enriched are identified.

671 Supplementary Table S6: GO enrichment analysis of Arabidopsis orthologs of genes overlapping  
672 top hits for multiple analyses/tissues. Significantly enriched GO biological processes are shown  
673 by hierarchical clustering, with the broadest categories further to the right and categories nested  
674 within them listed further to the left. Arrows show hierarchical relationships between GO terms.  
675 The n. of known genes in Arabidopsis corresponding to each GO term is given, as well as the  
676 observed and expected n. of genes, the fold-enrichment (i.e. ratio of observed to expected genes),  
677 and  $p$ -value used to determine whether the enrichment was statistically significant.

678 Supplementary Table S7: Summary of the most promising candidate genes, selected because  
679 they belong to a GO biological process category significantly enriched by >2.5-fold among the

680 subset of genes overlapping the top results for GWAS, TWAS leaf, TWAS shoot, FCT leaf,  
681 and/or FCT shoot. Because GO terms are nested, the broadest GO biological process and its fold-  
682 enrichment is presented, along with its nested sub-categories that were also significantly and  
683 >2.5-fold enriched. Descriptions for each Arabidopsis gene are given. Genes are identified that  
684 were determined by a literature survey to be implicated in a WUE-related trait: the reference  
685 used to make this determination is also given. Full references are in supplementary material S1.

686 Supplementary Table S8: BLUPs of all traits for all accessions.

687 Supplementary Table S9: Full GWAS results for each trait.

688

689 Supplementary Material S1: Full reference list from literature review of genes in Supplementary  
690 Table S7.

691

692 Supplementary Figure S1: Pearson's correlation coefficients ( $r$ , top right panels), pairwise  
693 correlation scatterplots (bottom left panels) and density plots (diagonal panels) for BLUPs of  
694 stomatal traits. Data are the same as in Figure 5.

695 Supplementary Figure S2: GWAS, TWAS and FCT results for  $g_s$  *light*. A: Upset plot showing the  
696 number of overlapping genes between the top hits in GWAS, TWAS leaf, TWAS shoot, FCT  
697 leaf, and/or FCT shoot. B: Manhattan plots of GWAS, TWAS and FCT results.

698 Supplementary Figure S3: GWAS, TWAS and FCT results for  $g_s$  *shade*. A: Upset plot showing the  
699 number of overlapping genes between the top hits in GWAS, TWAS leaf, TWAS shoot, FCT  
700 leaf, and/or FCT shoot. B: Manhattan plots of GWAS, TWAS and FCT results.

701 Supplementary Figure S4: GWAS, TWAS and FCT results for  $g_s$  *oscillation max*. A: Upset plot  
702 showing the number of overlapping genes between the top hits in GWAS, TWAS leaf, TWAS  
703 shoot, FCT leaf, and/or FCT shoot. B: Manhattan plots of GWAS, TWAS and FCT results.

704 Supplementary Figure S5: GWAS, TWAS and FCT results for  $g_s$  *initial min*. A: Upset plot showing  
705 the number of overlapping genes between the top hits in GWAS, TWAS leaf, TWAS shoot, FCT  
706 leaf, and/or FCT shoot. B: Manhattan plots of GWAS, TWAS and FCT results.

707 Supplementary Figure S6: GWAS, TWAS and FCT results for  $g_s$   $\Sigma$  *shade*. A: Upset plot showing  
708 the number of overlapping genes between the top hits in GWAS, TWAS leaf, TWAS shoot, FCT  
709 leaf, and/or FCT shoot. B: Manhattan plots of GWAS, TWAS and FCT results.

710 Supplementary Figure S7: GWAS, TWAS and FCT results for  $g_s$  *light* -  $g_s$  *shade*. A: Upset plot  
711 showing the number of overlapping genes between the top hits in GWAS, TWAS leaf, TWAS  
712 shoot, FCT leaf, and/or FCT shoot. B: Manhattan plots of GWAS, TWAS and FCT results.

713 Supplementary Figure S8: GWAS, TWAS and FCT results for  $t$  *initial min*. A: Upset plot showing  
714 the number of overlapping genes between the top hits in GWAS, TWAS leaf, TWAS shoot, FCT  
715 leaf, and/or FCT shoot. B: Manhattan plots of GWAS, TWAS and FCT results.

716 Supplementary Figure S9: GWAS, TWAS and FCT results for  $V$  *oscillation*. A: Upset plot showing  
717 the number of overlapping genes between the top hits in GWAS, TWAS leaf, TWAS shoot, FCT  
718 leaf, and/or FCT shoot. B: Manhattan plots of GWAS, TWAS and FCT results.

719 Supplementary Figure S10: GWAS, TWAS and FCT results for  $g_s$  *oscillation max* -  $g_s$  *oscillation min*. A:  
720 Upset plot showing the number of overlapping genes between the top hits in GWAS, TWAS  
721 leaf, TWAS shoot, FCT leaf, and/or FCT shoot. B: Manhattan plots of GWAS, TWAS and FCT  
722 results.

723 Supplementary Figure S11: GWAS, TWAS and FCT results for G2. A: Upset plot showing the  
724 number of overlapping genes between the top hits in GWAS, TWAS leaf, TWAS shoot, FCT  
725 leaf, and/or FCT shoot. B: Manhattan plots of GWAS, TWAS and FCT results.

726 Supplementary Figure S12: GWAS, TWAS and FCT results for G1. A: Upset plot showing the  
727 number of overlapping genes between the top hits in GWAS, TWAS leaf, TWAS shoot, FCT  
728 leaf, and/or FCT shoot. B: Manhattan plots of GWAS, TWAS and FCT results.

729 Supplementary Figure S13: Photograph (right) and corresponding thermal image (left) of  
730 experimental setup.

731

732 **Tables**

733 Table 1: Descriptive statistics of stomatal conductance traits.  $h^2$  is genomic heritability.  $t_{initial\ min}$  is in minutes, all other traits are  
 734 dimensionless. Graphical description of these traits is given in Fig. 1.

| Trait                                         | Description                                                                       | Mean   | SD     | Min    | Max   | $h^2$ |
|-----------------------------------------------|-----------------------------------------------------------------------------------|--------|--------|--------|-------|-------|
| $g_s\ light$                                  | Steady-state $g_s\ thermal$ at high <i>PPFD</i>                                   | 0.58   | 0.08   | 0.31   | 0.89  | 0.31  |
| $g_s\ shade$                                  | Steady-state $g_s\ thermal$ at low <i>PPFD</i>                                    | 0.17   | 0.07   | 0.05   | 0.49  | 0.70  |
| $(g_s\ light - g_s\ shade)$                   | Amplitude of overall decline in $g_s\ thermal$ from high to low <i>PPFD</i>       | 0.41   | 0.08   | 0.11   | 0.66  | 0.31  |
| $g_s\ initial\ min$                           | Minimum $g_s\ thermal$ reached after the <i>PPFD</i> decrease                     | 0.05   | 0.04   | -0.03  | 0.24  | 0.71  |
| $g_s\ oscillation\ max$                       | Maximum $g_s\ thermal$ reached as stomata re-opened at low <i>PPFD</i>            | 0.20   | 0.07   | 0.08   | 0.53  | 0.67  |
| $(g_s\ oscillation\ max - g_s\ initial\ min)$ | Amplitude of oscillation of $g_s\ thermal$ at low <i>PPFD</i>                     | 0.15   | 0.05   | 0.05   | 0.43  | 0.49  |
| $t_{initial\ min}$                            | Time for $g_s\ thermal$ to reach 110% of $g_s\ initial\ min$                      | 5.2    | 1.6    | 1.8    | 13.4  | 0.68  |
| $g_s\ \Sigma\ shade$                          | Area beneath the $g_s\ thermal$ curve following the <i>PPFD</i> decrease          | 84     | 32     | 28     | 231   | 0.72  |
| $V_{initial}$                                 | Exponential rate of decline in $g_s\ thermal$ after the <i>PPFD</i> decrease      | -0.89  | 0.27   | -2.23  | -0.08 | 0.67  |
| $V_{oscillation}$                             | Linear rate of increase in $g_s\ thermal$ as stomata re-opened at low <i>PPFD</i> | 0.0052 | 0.0028 | 0.0006 | 0.022 | 0.24  |

735

736

737 Table 2: N. of genes overlapping the top results of GWAS, TWAS and/or FCT in multiple traits.

| <b>N. of overlapping traits</b> | <b>N. of genes</b> |
|---------------------------------|--------------------|
| 1                               | 4575               |
| 2                               | 1463               |
| 3                               | 689                |
| 4                               | 281                |
| 5                               | 150                |
| 6                               | 97                 |
| 7                               | 38                 |
| 8                               | 11                 |
| 9                               | 6                  |
| 10                              | 1                  |

738

739



740

741

742 **Figure legends**

743 Figure 1: Schematic of  $g_s$  thermal analysis method, where  $g_s$  thermal is a proxy for stomatal conductance to water vapor ( $g_s$ ) that is derived  
 744 from thermal imaging. Each response was measured on a single leaf of sorghum, exposed to  $PPFD=750 \mu\text{mol m}^{-2} \text{s}^{-1}$  for 40 minutes.  
 745 At  $t=0$ , indicated by an arrow,  $PPFD$  was reduced by 90%. Black circles show  $g_s$  thermal. Crosses show measurements from  $t=0$  to  $t=0.9$   
 746 minutes which were removed because they consistently showed an anomalous spike.  $g_s$  light, the steady-state high- $PPFD$  value of  $g_s$   
 747 thermal, was the mean  $g_s$  thermal from  $t=-5$  to 0 minutes (red circle).  $g_s$  shade, the steady-state low- $PPFD$  value of  $g_s$  thermal, was the mean  $g_s$   
 748 thermal from  $t=52$  to 60 minutes (blue circle).  $g_s \Sigma$  shade was the area under the curve from  $t=0$  to 60 minutes.  $g_s$  initial min was the minimum  
 749 of  $g_s$  thermal reached immediately after the decrease in  $PPFD$  (orange circle).  $g_s$  oscillation max was the maximum of  $g_s$  thermal reached during  
 750 stomatal re-opening at low  $PPFD$  (pink circle). The time at which  $g_s$  thermal reached 110% of  $g_s$  initial min was recorded as  $t$  initial min (dotted  
 751 orange line).  $V$  initial, the initial rate of decline in  $g_s$  thermal after the decrease in  $PPFD$ , was the exponential rate of decline of  $g_s$  thermal  $t=-$   
 752 0.1 minutes to  $t= t$  initial min (solid green line).  $V$  oscillation was the linear rate of increase in  $g_s$  thermal during stomatal reopening at low  $PPFD$   
 753 (dashed green line).

754 Figure 2: Representative responses of  $g_s$  thermal and  $g_s$  to a 90% drop in  $PPFD$  for two accessions: PI455257 and PI525728.  $g_s$  thermal was  
 755 measured from thermal imaging as a proxy for  $g_s$ . Each  $g_s$  thermal response curve was measured on a single leaf, acclimated to  
 756  $PPFD=750 \mu\text{mol m}^{-2} \text{s}^{-1}$  for 40 minutes, then  $PPFD$  was reduced by 90% for 60 minutes at  $t=0$ , indicated by an arrow. On a subset of  
 757 plants, including the two shown here, the protocol was immediately repeated to measure  $g_s$  using gas exchange.

758 Figure 3: Correlation scatterplots between stomatal conductance traits derived from  $g_s$  thermal measurements and their counterparts  
 759 derived from  $g_s$  measurements. Data are for a subset of plants that were first imaged using a thermal camera to obtain  $g_s$  thermal, then  
 760 immediately measured with gas exchange to obtain  $g_s$ .  $t$  initial min is in minutes, all other  $g_s$  thermal traits are dimensionless. Pearson's  $r$  and  
 761 the associated  $p$ -value, along with Spearman's rank-order  $\rho$ , are also given.

762 Figure 4: Representative responses of  $g_s$  *thermal* to a 90% decrease in *PPFD* in six accessions, selected to highlight the diverse stomatal  
763 responses to decreasing *PPFD* measured in the sorghum diversity panel. Different symbols and shades of gray show distinct replicate  
764 plants for each accession. Each  $g_s$  *thermal* response curve was measured on a single leaf, acclimated to  $PPFD=750 \mu\text{mol m}^{-2} \text{s}^{-1}$  for 40  
765 minutes, then *PPFD* was reduced by 90% for 60 minutes at  $t=0$ , indicated by an arrow. Values in the table are the mean of stomatal  
766 conductance traits for each accession.  $t_{\text{initial min}}$  is in minutes, all other traits are dimensionless.

767 Figure 5: Pearson's correlation coefficients ( $r$ ) between BLUPs of stomatal conductance traits. The size of circles indicates the  
768 strength of correlation, while color indicates whether the pairwise relationship was negative ( $r<0$ , red) or positive ( $r>0$ , blue). All  
769 corresponding scatterplots are given in Supplementary Fig. S1.

770 Figure 6: Correlation scatterplots between BLUPs for stomatal conductance traits. Pearson's  $r$  and the associated  $p$ -value are also  
771 given.

772 Figure 7: GWAS, TWAS and FCT results for  $g_s$  *light*. A: Upset plot showing the number of overlapping genes between the top hits in  
773 GWAS, TWAS leaf, TWAS shoot, FCT leaf, and/or FCT shoot. B: Manhattan plots of GWAS, TWAS and FCT results. Top hits are  
774 highlighted if they correspond to orthologues of known Arabidopsis stomatal genes (FMA, POLAR and EPF2, Table 3). Top hits are  
775 also highlighted if they are among the highest confidence genes identified by GWAS, TWAS, FCT, and subsequent GO enrichment  
776 analysis. (Supplementary Table S7). Equivalent figures for all other traits are in Supplemental Figures S2-12.

777 Figure 8: Results of GO enrichment analysis of higher confidence genes. Bars gives the number of genes included in each of the  
778 categories of GO biological processes that were significantly and  $>2.5$ -fold enriched. Fold-enrichment is shown in the label beneath  
779 each bar. Full GO enrichment analysis results are in Supplementary Table S6.

780



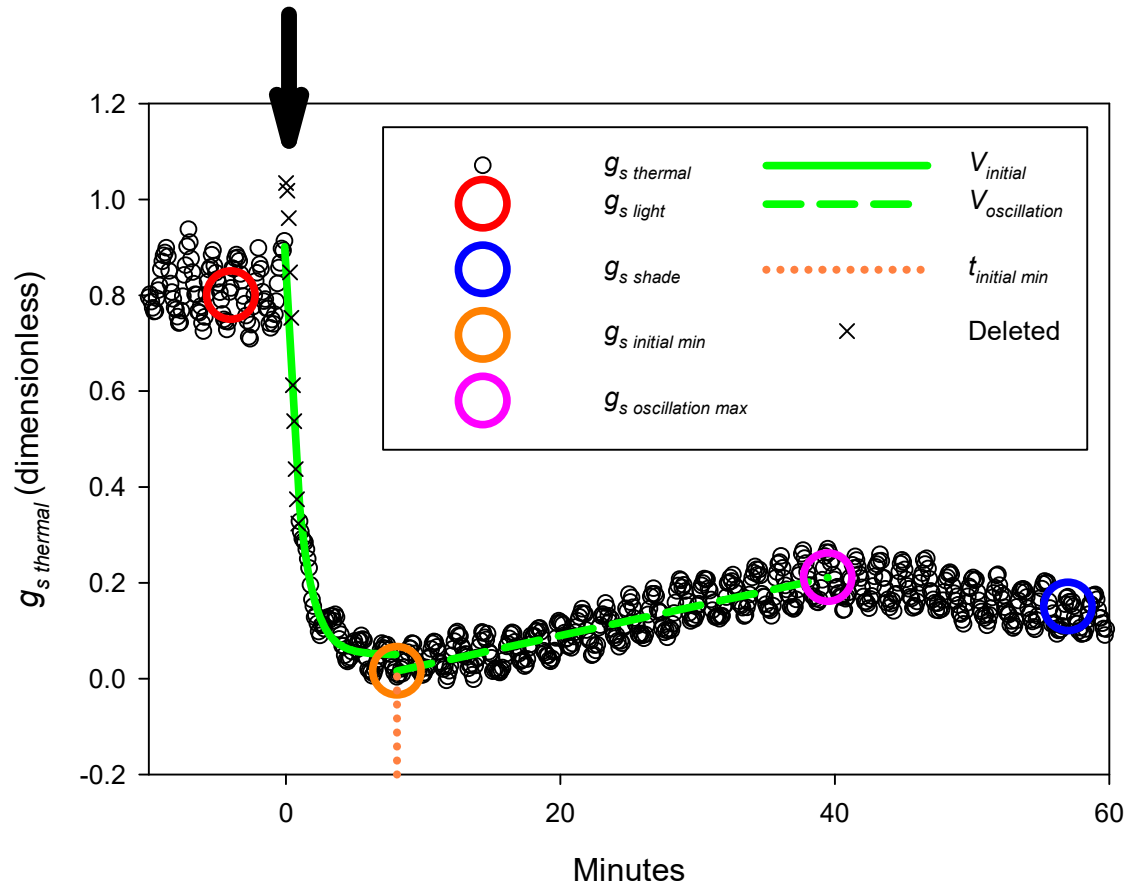

Figure 1: Schematic of  $g_s$  thermal analysis method, where  $g_s$  thermal is a proxy for stomatal conductance to water vapor ( $g_s$ ) that is derived from thermal imaging. Each response was measured on a single leaf of sorghum, exposed to  $PPFD=750 \mu\text{mol m}^{-2} \text{s}^{-1}$  for 40 minutes. At  $t=0$ , indicated by an arrow,  $PPFD$  was reduced by 90%. Black circles show  $g_s$  thermal. Crosses show measurements from  $t=0$  to  $t=0.9$  minutes which were removed because they consistently showed an anomalous spike.  $g_s$  light, the steady-state high- $PPFD$  value of  $g_s$  thermal, was the mean  $g_s$  thermal from  $t=-5$  to 0 minutes (red circle).  $g_s$  shade, the steady-state low- $PPFD$  value of  $g_s$  thermal, was the mean  $g_s$  thermal from  $t=52$  to 60 minutes (blue circle).  $g_s \Sigma$  shade was the area under the curve from  $t=0$  to 60 minutes.  $g_s$  initial min was the minimum of  $g_s$  thermal reached immediately after the decrease in  $PPFD$  (orange circle).  $g_s$  oscillation max was the maximum of  $g_s$  thermal reached during stomatal re-opening at low  $PPFD$  (pink circle). The time at which  $g_s$  thermal reached 110% of  $g_s$  initial min was recorded as  $t$  initial min (dotted orange line).  $V$  initial, the initial rate of decline in  $g_s$  thermal after the decrease in  $PPFD$ , was the exponential rate of decline of  $g_s$  thermal  $t=-0.1$  minutes to  $t= t$  initial min (solid green line).  $V$  oscillation was the linear rate of increase in  $g_s$  thermal during stomatal re-opening at low  $PPFD$  (dashed green line).

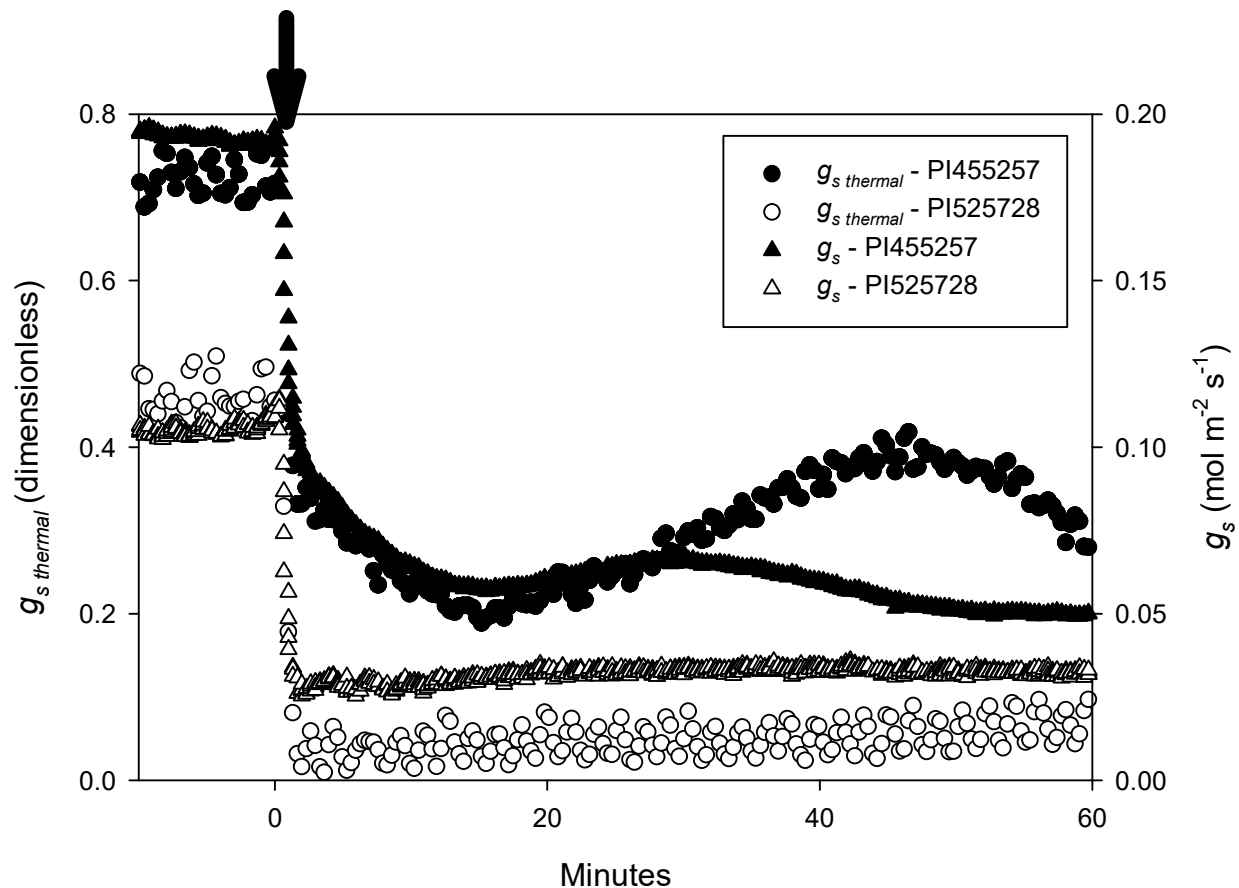

Figure 2: Representative responses of  $g_{s \text{ thermal}}$  and  $g_s$  to a 90% drop in PPFD for two accessions: PI455257 and PI525728.  $g_{s \text{ thermal}}$  was measured from thermal imaging as a proxy for  $g_s$ . Each  $g_{s \text{ thermal}}$  response curve was measured on a single leaf, acclimated to  $PPFD=750 \mu\text{mol m}^{-2} \text{s}^{-1}$  for 40 minutes, then PPFD was reduced by 90% for 60 minutes at  $t=0$ , indicated by an arrow. On a subset of plants, including the two shown here, the protocol was immediately repeated to measure  $g_s$  using gas exchange.

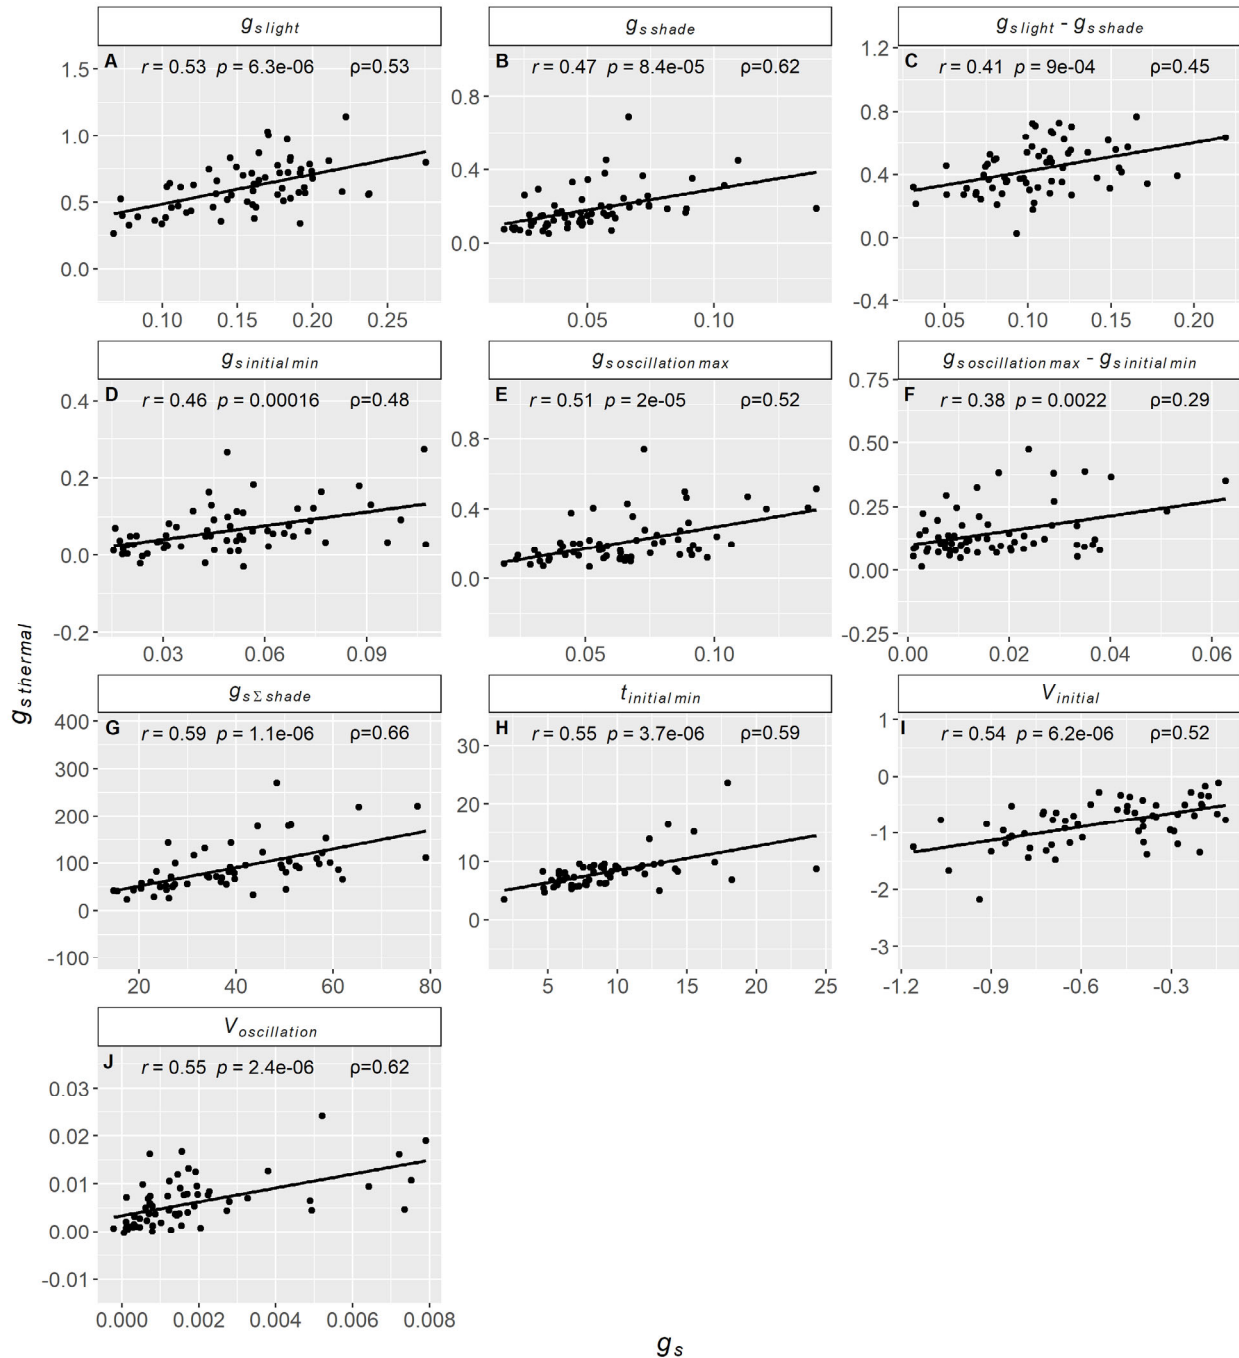

Figure 3: Correlation scatterplots between stomatal conductance traits derived from  $g_s$  thermal measurements and their counterparts derived from  $g_s$  measurements. Data are for a subset of plants that were first imaged using a thermal camera to obtain  $g_s$  thermal, then immediately measured with gas exchange to obtain  $g_s$ .  $t_{\text{initial min}}$  is in minutes, all other  $g_s$  thermal traits are dimensionless. Pearson's  $r$  and the associated  $p$ -value, along with Spearman's rank-order  $\rho$ , are also given.

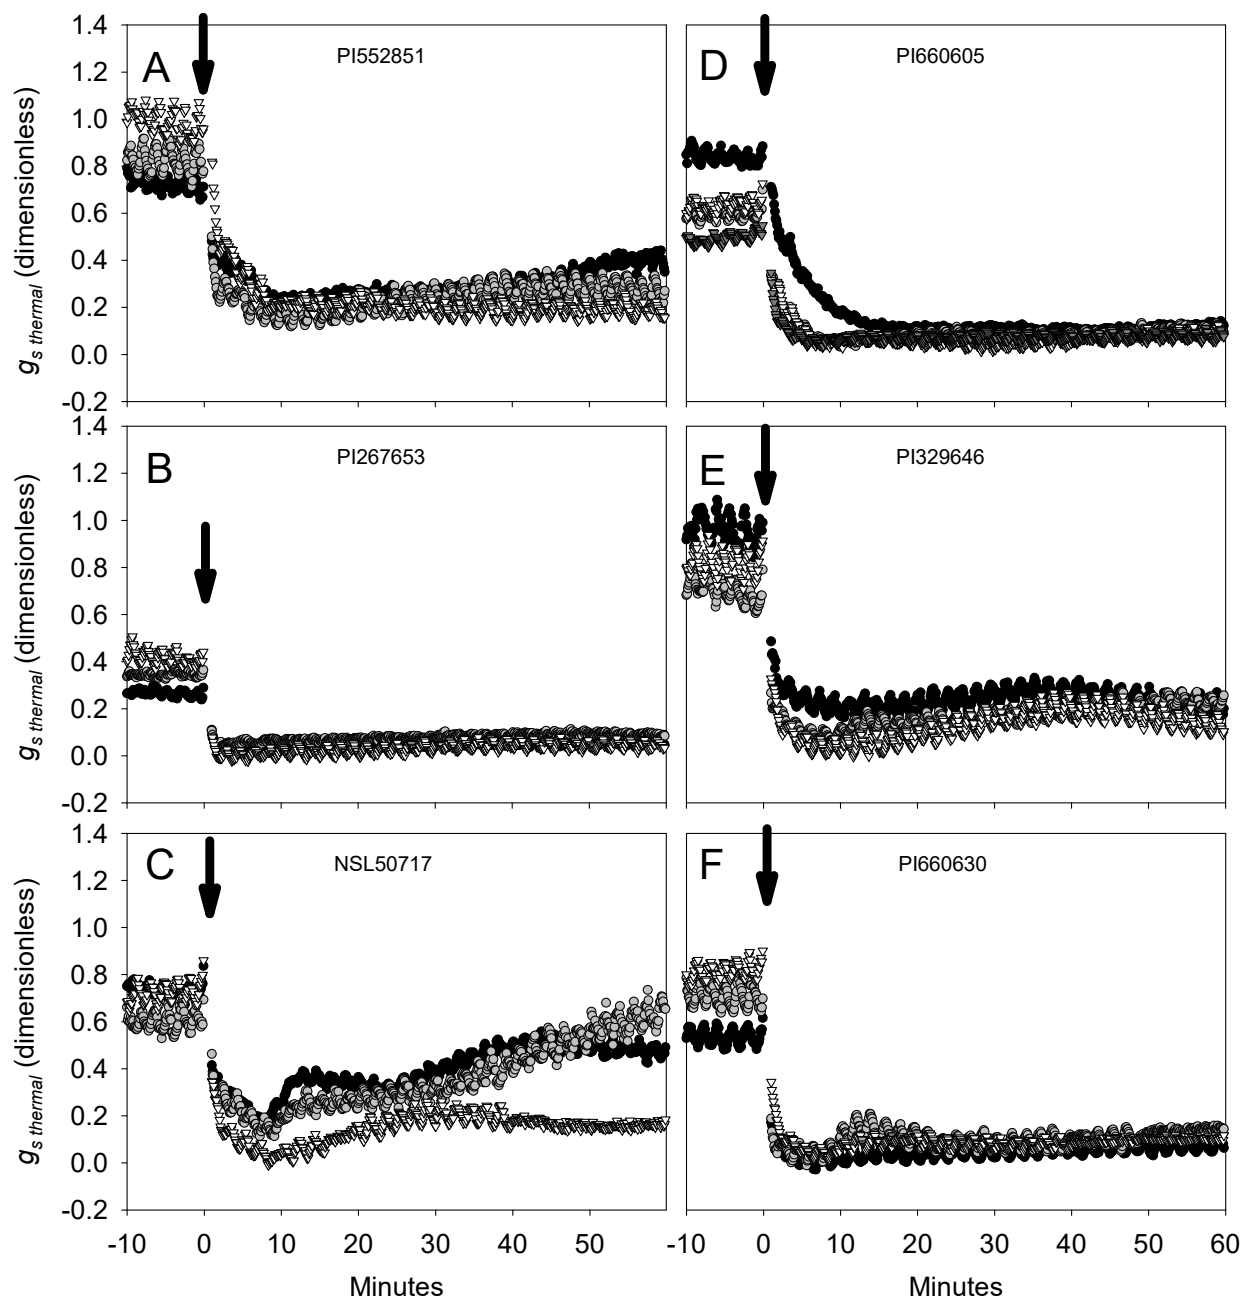

| Accession | $g_s$<br>light | $g_s$<br>shade | $g_s$ light<br>–<br>$g_s$ shade | $g_s$ initial<br>min | $g_s$<br>oscillation<br>max | $g_s$ oscillation max<br>–<br>$g_s$ initial min | $t_{initial}$<br>min | $g_s \Sigma$<br>shade | $V_{initial}$ | $V_{oscillation}$ |
|-----------|----------------|----------------|---------------------------------|----------------------|-----------------------------|-------------------------------------------------|----------------------|-----------------------|---------------|-------------------|
| NSL50717  | 0.69           | 0.42           | 0.27                            | 0.09                 | 0.32                        | 0.23                                            | 5.6                  | 179                   | -0.76         | 0.021             |
| PI267653  | 0.34           | 0.06           | 0.28                            | 0.01                 | 0.09                        | 0.08                                            | 2.4                  | 30                    | -1.58         | 0.001             |
| PI329646  | 0.81           | 0.20           | 0.61                            | 0.07                 | 0.26                        | 0.19                                            | 4.9                  | 106                   | -0.96         | 0.008             |
| PI552851  | 0.84           | 0.29           | 0.55                            | 0.18                 | 0.36                        | 0.18                                            | 7.5                  | 150                   | -0.41         | 0.003             |
| PI660605  | 0.64           | 0.10           | 0.54                            | 0.05                 | 0.11                        | 0.06                                            | 6.1                  | 58                    | -0.48         | 0.003             |
| PI660630  | 0.69           | 0.11           | 0.58                            | -0.01                | 0.15                        | 0.16                                            | 3.4                  | 47                    | -1.22         | 0.010             |



Figure 4: Representative responses of  $g_s$  *thermal* to a 90% decrease in  $PPFD$  in six accessions, selected to highlight the diverse stomatal responses to decreasing  $PPFD$  measured in the sorghum diversity panel. Different symbols and shades of gray show distinct replicate plants for each accession. Each  $g_s$  *thermal* response curve was measured on a single leaf, acclimated to  $PPFD=750 \mu\text{mol m}^{-2} \text{s}^{-1}$  for 40 minutes, then  $PPFD$  was reduced by 90% for 60 minutes at  $t=0$ , indicated by an arrow. Values in the table are the mean of stomatal conductance traits for each accession.  $t_{initial \ min}$  is in minutes, all other traits are dimensionless.

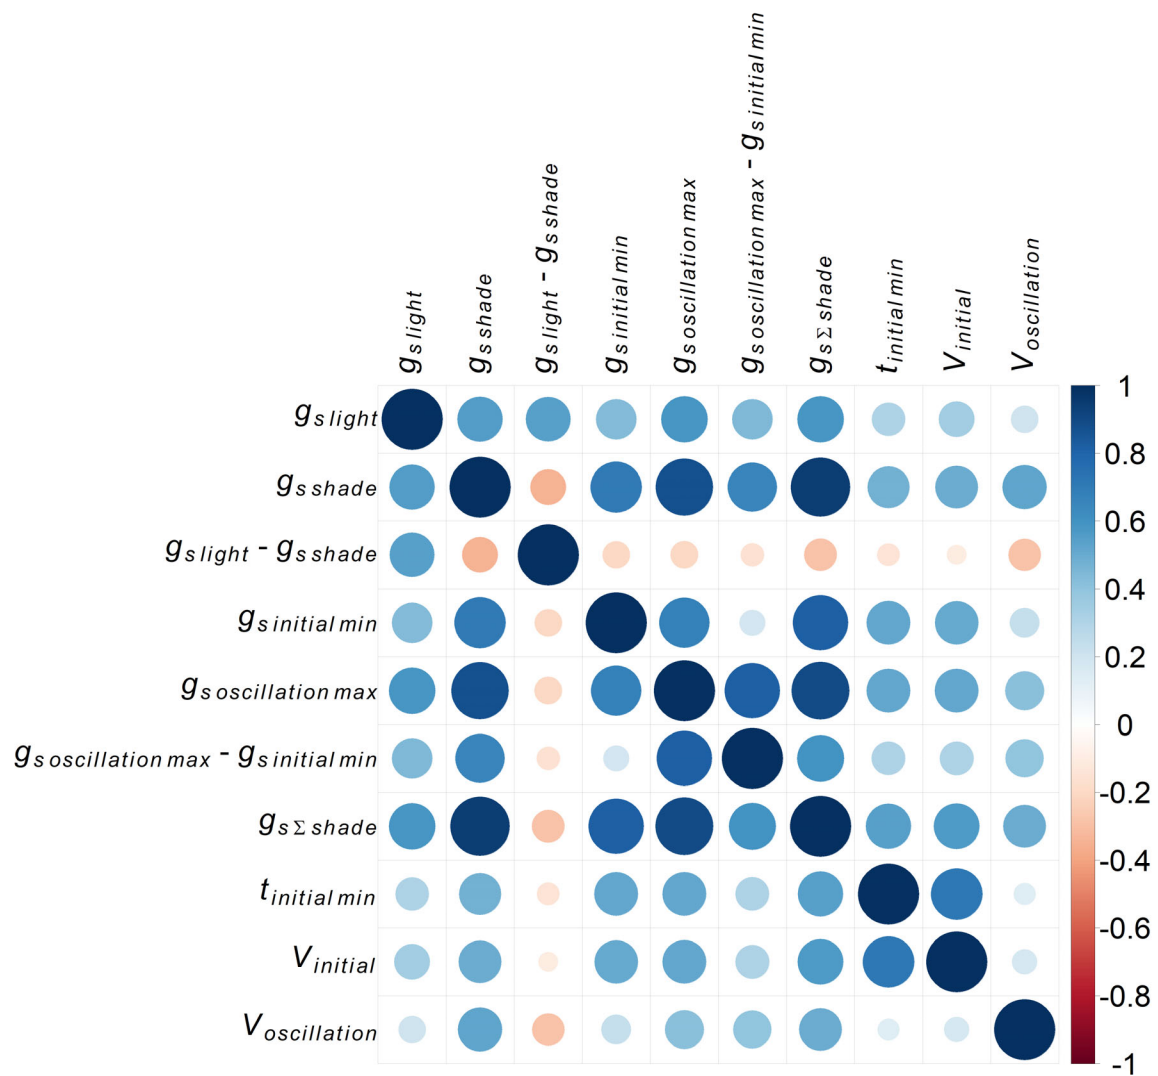

Figure 5: Pearson's correlation coefficients ( $r$ ) between BLUPs of stomatal conductance traits. The size of circles indicates the strength of correlation, while color indicates whether the pairwise relationship was negative ( $r < 0$ , red) or positive ( $r > 0$ , blue). All corresponding scatterplots are given in Supplementary Fig. S1.

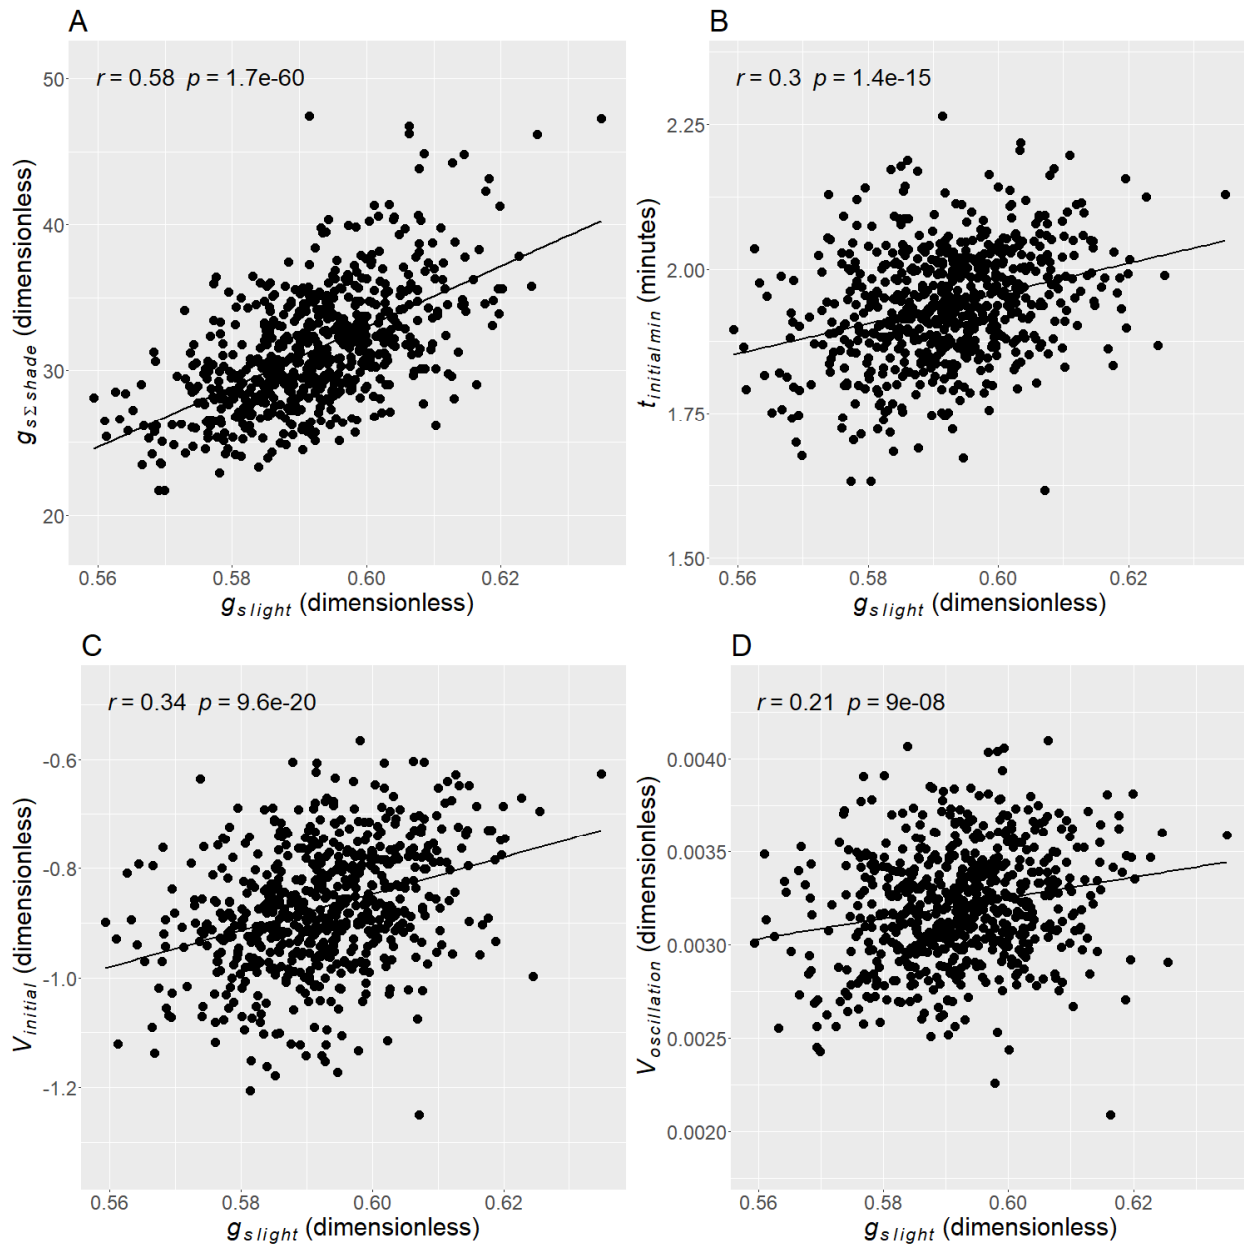

Figure 6: Correlation scatterplots between BLUPs for stomatal conductance traits. Pearson's  $r$  and the associated  $p$ -value are also given.



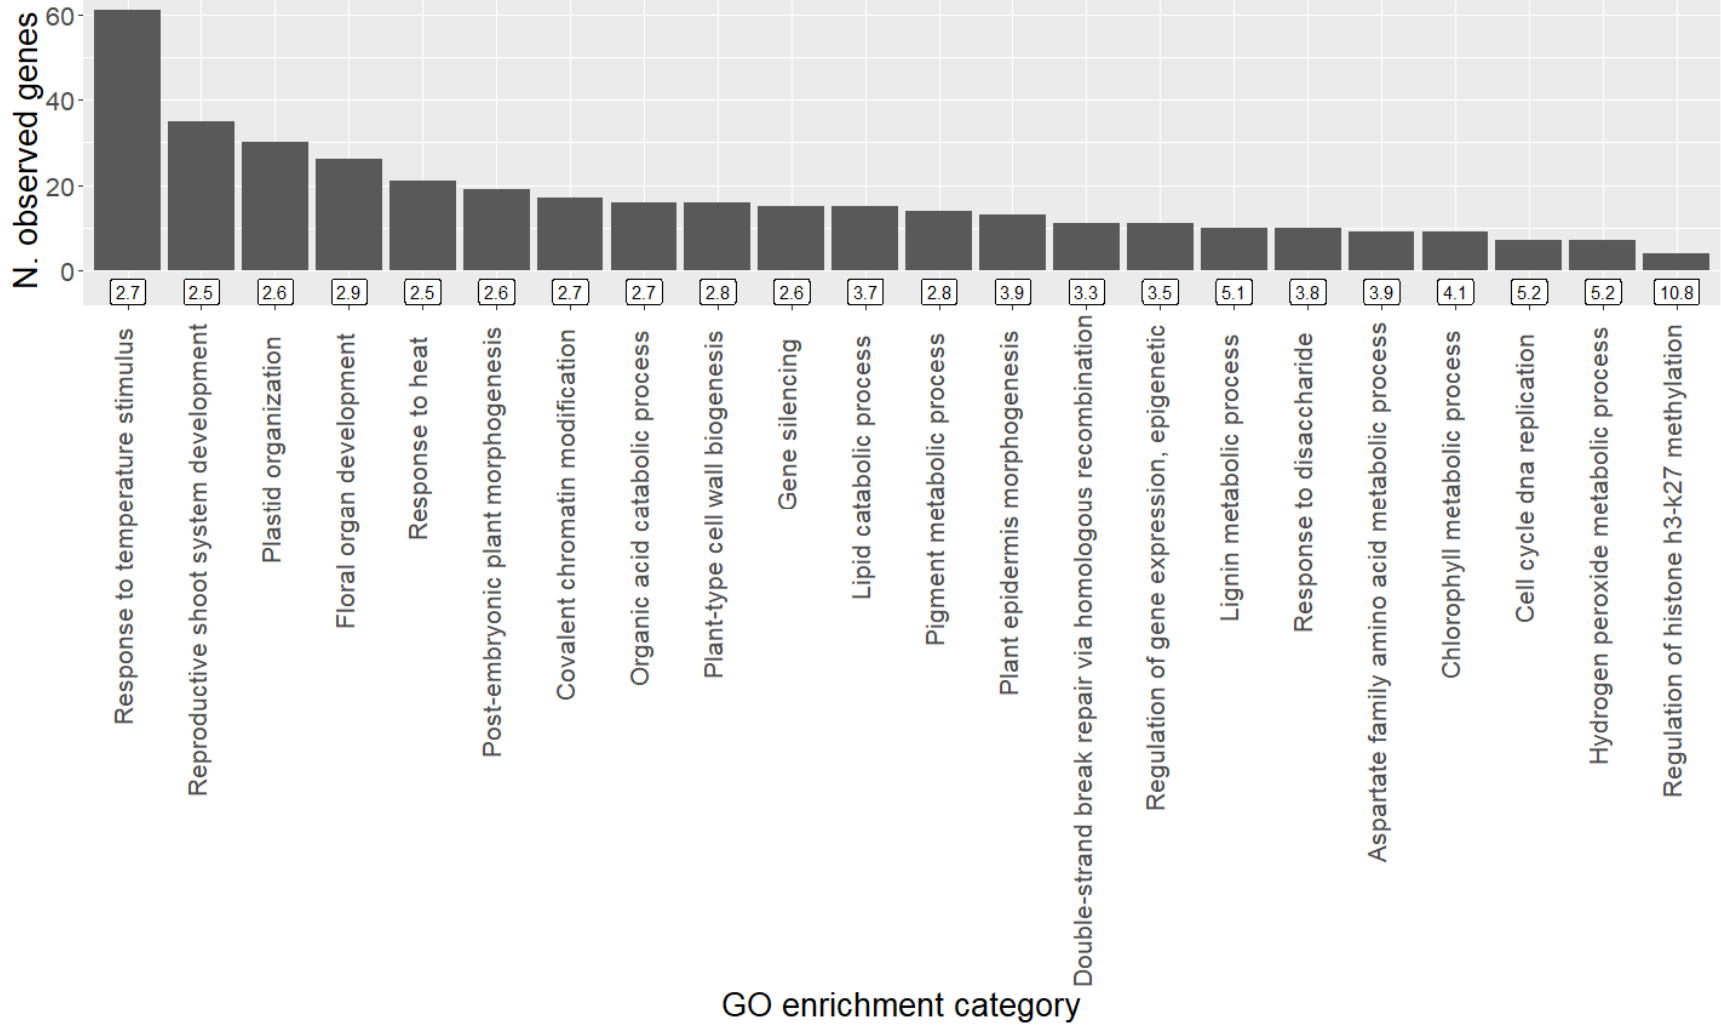

Figure 8: Results of GO enrichment analysis of higher confidence genes. Bars gives the number of genes included in each of the categories of GO biological processes that were significantly and >2.5-fold enriched. Fold-enrichment is shown in the label beneath each bar. Full GO enrichment analysis results are in Supplementary Table S6.

## Parsed Citations

**Acevedo-Siaca LG, Coe R, Wang Y, Kromdijk J, Quick WP, Long SP (2020) Variation in photosynthetic induction between rice accessions and its potential for improving productivity. *New Phytologist*: 12**

Google Scholar: [Author Only](#) [Title Only](#) [Author and Title](#)

**Ashburner M, Ball CA, Blake JA, Botstein D, Butler H, Cherry JM, Davis AP, Dolinski K, Dwight SS, Eppig JT, Harris MA, Hill DP, Issel-Tarver L, Kasarskis A, Lewis S, Matese JC, Richardson JE, Ringwald M, Rubin GM, Sherlock G, Gene Ontology C (2000) Gene Ontology: tool for the unification of biology. *Nature Genetics* 25: 25-29**

Google Scholar: [Author Only](#) [Title Only](#) [Author and Title](#)

**Assmann SM, Jegla T (2016) Guard cell sensory systems: recent insights on stomatal responses to light, abscisic acid, and CO<sub>2</sub>. *Current Opinion in Plant Biology* 33: 157-167**

Google Scholar: [Author Only](#) [Title Only](#) [Author and Title](#)

**Assmann SM, Shimazaki K (1999) The multisensory guard cell. Stomatal responses to blue light and abscisic acid. *Plant Physiology* 119: 809-815**

Google Scholar: [Author Only](#) [Title Only](#) [Author and Title](#)

**Ballard T, Peak D, Mott K (2019) Blue and red light effects on stomatal oscillations. *Functional Plant Biology* 46: 146-151**

Google Scholar: [Author Only](#) [Title Only](#) [Author and Title](#)

**Bartlett MK, Klein T, Jansen S, Choat B, Sack L (2016) The correlations and sequence of plant stomatal, hydraulic, and wilting responses to drought. *Proceedings of the National Academy of Sciences of the United States of America* 113: 13098-13103**

Google Scholar: [Author Only](#) [Title Only](#) [Author and Title](#)

**Bergmann DC, Lukowitz W, Somerville CR (2004) Stomatal development and pattern controlled by a MAPKK kinase. *Science* 304: 1494-1497**

Google Scholar: [Author Only](#) [Title Only](#) [Author and Title](#)

**Bernal-Vasquez AM, Utz HF, Piepho HP (2016) Outlier detection methods for generalized lattices: a case study on the transition from ANOVA to REML. *Theoretical and Applied Genetics* 129: 787-804**

Google Scholar: [Author Only](#) [Title Only](#) [Author and Title](#)

**Best NB, Hartwig T, Budka J, Fujioka S, Johal G, Schulz B, Dilkes BP (2016) nana plant2 Encodes a Maize Ortholog of the Arabidopsis Brassinosteroid Biosynthesis Gene DWARF1, Identifying Developmental Interactions between Brassinosteroids and Gibberellins. *Plant Physiology* 171: 2633-2647**

Google Scholar: [Author Only](#) [Title Only](#) [Author and Title](#)

**Bian C, Guo XY, Zhang Y, Wang L, Xu TD, DeLong A, Dong J (2020) Protein phosphatase 2A promotes stomatal development by stabilizing SPEECHLESS in Arabidopsis. *Proceedings of the National Academy of Sciences of the United States of America* 117: 13127-13137**

Google Scholar: [Author Only](#) [Title Only](#) [Author and Title](#)

**Boudolf V, Vieghe K, Beemster GTS, Magyar Z, Acosta JAT, Maes S, Van Der Schueren E, INze D, De Veylder L (2004) The plant-specific cyclin-dependent kinase CDKB1;1 and transcription factor E2Fa-DPa control the balance of mitotically dividing and endoreduplicating cells in Arabidopsis. *Plant Cell* 16: 2683-2692**

Google Scholar: [Author Only](#) [Title Only](#) [Author and Title](#)

**Boyer JS (1982) Plant productivity and environment. *Science* 218: 443-448**

Google Scholar: [Author Only](#) [Title Only](#) [Author and Title](#)

**Bradbury PJ, Zhang Z, Kroon DE, Casstevens TM, Ramdoss Y, Buckler ES (2007) TASSEL: software for association mapping of complex traits in diverse samples. *Bioinformatics* 23: 2633-2635**

Google Scholar: [Author Only](#) [Title Only](#) [Author and Title](#)

**Browning BL, Browning SR (2016) Genotype Imputation with Millions of Reference Samples. *American Journal of Human Genetics* 98: 116-126**

Google Scholar: [Author Only](#) [Title Only](#) [Author and Title](#)

**Burks PS, Kaiser CM, Hawkins EM, Brown PJ (2015) Genomewide Association for Sugar Yield in Sweet Sorghum. *Crop Science* 55: 2138-2148**

Google Scholar: [Author Only](#) [Title Only](#) [Author and Title](#)

**Butler DG, Cullis BR, Gilmour AR, Gogel BJ (2009) ASReml-R reference manual. The State of Queensland, Department of Primary Industries and Fisheries, Brisbane .**

Google Scholar: [Author Only](#) [Title Only](#) [Author and Title](#)

**Carbon S, Douglass E, Dunn N, Good B, Harris NL, Lewis SE, Mungall CJ, Basu S, Chisholm RL, Dodson RJ, Hartline E, Fey P, Thomas PD, Albou LP, Ebert D, Kesling MJ, Mi H, Muruganujan A, Huang X, Poudel S, Mushayahama T, Hu JC, LaBonte SA, Siegele DA, Antonazzo G, Attrill H, Brown NH, Fexova S, Garapati P, Jones TEM, Marygold SJ, Millburn GH, Rey AJ, Trovisco V, dos Santos G, Emmert DB, Falls K, Zhou P, Goodman JL, Strelets VB, Thurmond J, Courtot M, Osumi-Sutherland D, Parkinson H, Roncaglia P,**

Acencio ML, Kuiper M, Laegreid A, Logie C, Lovering RC, Huntley RP, Denny P, Campbell NH, Kramarz B, Acquah V, Ahmad SH, Chen H, Rawson JH, Chibucos MC, Giglio M, Nadendla S, Tauber R, Duesbury MJ, Del-Toro N, Meldal BHM, Perfetto L, Porras P, Orchard S, Shrivastava A, Xie Z, Chang HY, Finn RD, Mitchell AL, Rawlings ND, Richardson L, Sangrador-Vegas A, Blake JA, Christie KR, Dolan ME, Drabkin HJ, Hill DP, Ni L, Sitnikov D, Harris MA, Oliver SG, Ruther-Ford K, Wood V, Hayles J, Bahler J, Lock A, Bolton ER, De Pons J, Dwinell M, Hayman GT, Laulederkind SJF, Shimoyama M, Tutaj M, Wang SJ, D'Eustachio P, Matthews L, Balhoff JP, Aleksander SA, Binkley G, Dunn BL, Cherry JM, Engel SR, Gondwe F, Karra K, MacPherson KA, Miyasato SR, Nash RS, Ng PC, Sheppard TK, Shrivatsav VPA, Simson M, Skrzypek MS, Weng S, Wong ED, Feuermann M, Gaudet P, Bakker E, Berardini TZ, Reiser L, Subramaniam S, Huala E, Arighi C, Auchincloss A, Axelsen K, Argoud-Puy G, Bateman A, Bely B, Blatter MC, Boutet E, Breuza L, Bridge A, Britto R, Bye-A-Jee H, Casals-Casas C, Coudert E, Estreicher A, Fannigietti L, Garmiri P, Georgiou G, Gos A, Gruaz-Gumowski N, Hatton-Ellis E, Hinz U, Hulo C, Ignatchenko A, Jungo F, Keller G, Laiho K, Lemercier P, Lieberherr D, Lussi Y, Mac-Dougall A, Magrane M, Martin MJ, Masson P, Natale DA, Hyka-Nouspikel N, Pedruzzi I, Pichler K, Poux S, Rivoire C, Rodriguez-Lopez M, Sawford T, Speretta E, Shypitsyna A, Stutz A, Sundaram S, Tognolli M, Tyagi N, Warner K, Zaru R, Wu C, Diehl AD, Chan J, Cho J, Gao S, Grove C, Harrison MC, Howe K, Lee R, Mendel J, Muller HM, Raciti D, Van Auken K, Berriman M, Stein L, Sternberg PW, Howe D, Toro S, Westerfield M, Gene Ontology C (2019) The Gene Ontology Resource: 20 years and still GOing strong. *Nucleic Acids Research* 47: D330-D338

Google Scholar: [Author Only](#) [Title Only](#) [Author and Title](#)

Casa AM, Pressoir G, Brown PJ, Mitchell SE, Rooney WL, Tuinstra MR, Franks CD, Kresovich S (2008) Community resources and strategies for association mapping in sorghum. *Crop Science* 48: 30-40

Google Scholar: [Author Only](#) [Title Only](#) [Author and Title](#)

Cernac A, Benning C (2004) WRINKLED1 encodes an AP2/EREB domain protein involved in the control of storage compound biosynthesis in *Arabidopsis*. *Plant Journal* 40: 575-585

Google Scholar: [Author Only](#) [Title Only](#) [Author and Title](#)

Chakravorty D, Gookin TE, Milner MJ, Yu YQ, Assmann SM (2015) Extra-Large G Proteins Expand the Repertoire of Subunits in *Arabidopsis* Heterotrimeric G Protein Signaling. *Plant Physiology* 169: 512-+

Google Scholar: [Author Only](#) [Title Only](#) [Author and Title](#)

Chang CC, Chow CC, Tellier L, Vattikuti S, Purcell SM, Lee JJ (2015) Second-generation PLINK: rising to the challenge of larger and richer datasets. *Gigascience* 4: 16

Google Scholar: [Author Only](#) [Title Only](#) [Author and Title](#)

Chater CCC, Caine RS, Fleming AJ, Gray JE (2017) Origins and Evolution of Stomatal Development. *Plant Physiology* 174: 624-638

Google Scholar: [Author Only](#) [Title Only](#) [Author and Title](#)

Chen L, Guan LP, Qian PP, Xu F, Wu ZL, Wu YJ, He K, Gou XP, Li J, Hou SW (2016) NRPB3, the third largest subunit of RNA polymerase II, is essential for stomatal patterning and differentiation in *Arabidopsis*. *Development* 143: 1600-1611

Google Scholar: [Author Only](#) [Title Only](#) [Author and Title](#)

Cominelli E, Galbiati M, Vavasseur A, Conti L, Sala T, Vuylsteke M, Leonhardt N, Dellaporta SL, Tonelli C (2005) A guard-cell-specific MYB transcription factor regulates stomatal movements and plant drought tolerance. *Current Biology* 15: 1196-1200

Google Scholar: [Author Only](#) [Title Only](#) [Author and Title](#)

de los Campos G, Sorensen D, Gianola D (2015) Genomic Heritability: What Is It? *Plos Genetics* 11: 21

De Souza AP, Wang Y, Orr DJ, Carmo-Silva E, Long SP (2020) Photosynthesis across African cassava germplasm is limited by Rubisco and mesophyll conductance at steady state, but by stomatal conductance in fluctuating light. *New Phytologist* 225: 2498-2512

Google Scholar: [Author Only](#) [Title Only](#) [Author and Title](#)

Deans RM, Brodrribb TJ, Busch FA, Farquhar GD (2019) Plant water-use strategy mediates stomatal effects on the light induction of photosynthesis. *New Phytologist* 222: 382-395

Google Scholar: [Author Only](#) [Title Only](#) [Author and Title](#)

DeLucia EH, Chen S, Guan K, Peng B, Li Y, Gomez-Casanovas N, Kantola IB, Bernacchi CJ, Huang Y, Long SP, Ort DR (2019) Are we approaching a water ceiling to maize yields in the United States? *Ecosphere* 10(6)

dos Santos JPR, Fernandes SB, McCoy S, Lozano R, Brown PJ, Leakey ADB, Buckler ES, Garcia AAF, Gore MA (2020) Novel Bayesian Networks for Genomic Prediction of Developmental Traits in Biomass Sorghum. *G3-Genes Genomes Genetics* 10: 769-781

Google Scholar: [Author Only](#) [Title Only](#) [Author and Title](#)

Doyle J, Doyle J (1987) A rapid procedure for DNA purification from small quantities of fresh leaf tissue. *Phytochemical Bulletin* 19: 11-15

Google Scholar: [Author Only](#) [Title Only](#) [Author and Title](#)

Durand M, Brendel O, Bure C, Le Thiec D (2019) Altered stomatal dynamics induced by changes in irradiance and vapour-pressure deficit under drought: impacts on the whole-plant transpiration efficiency of poplar genotypes. *New Phytologist* 222: 1789-1802

Google Scholar: [Author Only](#) [Title Only](#) [Author and Title](#)

Edwards EJ, Osborne CP, Stromberg CAE, Smith SA, Bond WJ, Christin PA, Cousins AB, Duvall MR, Fox DL, Freckleton RP, Ghannoum O, Hartwell J, Huang YS, Janis CM, Keeley JE, Kellogg EA, Knapp AK, Leakey ADB, Nelson DM, Saarela JM, Sage RF, Sala OE, Salamin N, Still CJ, Tipler B, Consortium CG (2010) The Origins of C4 Grasslands: Integrating Evolutionary and Ecosystem Science. *Science* 328: 587-591

Google Scholar: [Author Only](#) [Title Only](#) [Author and Title](#)



- Elshire RJ, Glaubitz JC, Sun Q, Poland JA, Kawamoto K, Buckler ES, Mitchell SE (2011) A Robust, Simple Genotyping-by-Sequencing (GBS) Approach for High Diversity Species. *Plos One* 6: 10  
Google Scholar: [Author Only](#) [Title Only](#) [Author and Title](#)
- Endelman JB, Jannink JL (2012) Shrinkage Estimation of the Realized Relationship Matrix. *G3-Genes Genomes Genetics* 2: 1405-1413  
Google Scholar: [Author Only](#) [Title Only](#) [Author and Title](#)
- FAO, IFAD, UNICEF, WFP, WHO (2018) The State of Food Security and Nutrition in the World 2018. Building climate resilience for food security and nutrition. In. FAO, Rome, p 202  
Google Scholar: [Author Only](#) [Title Only](#) [Author and Title](#)
- Faralli M, Matthews J, Lawson T (2019) Exploiting natural variation and genetic manipulation of stomatal conductance for crop improvement. *Current Opinion in Plant Biology* 49: 1-7  
Google Scholar: [Author Only](#) [Title Only](#) [Author and Title](#)
- Ferguson JF, Fernandes SB, Monier B, Miller ND, Allen D, Dmitrieva, Schmuker P, Lozano R, Valluru R, Buckler ES, Gore MA, Brown PJ, Spalding EP, Leakey ADB (2020) Machine learning enabled phenotyping for GWAS and TWAS of WUE traits in 869 field-grown sorghum accessions. *BioRxiv* <https://www.biorxiv.org/content/10.1101/2020.11.02.365213v1>  
Google Scholar: [Author Only](#) [Title Only](#) [Author and Title](#)
- Filzmoser P, Garrett RG, Reimann C (2005) Multivariate outlier detection in exploration geochemistry. *Computers & Geosciences* 31: 579-587  
Google Scholar: [Author Only](#) [Title Only](#) [Author and Title](#)
- Franks PJ, Farquhar GD (2007) The mechanical diversity of stomata and its significance in gas-exchange control. *Plant Physiology* 143: 78-87  
Google Scholar: [Author Only](#) [Title Only](#) [Author and Title](#)
- Glaubitz JC, Casstevens TM, Lu F, Harriman J, Elshire RJ, Sun Q, Buckler ES (2014) TASSEL-GBS: A High Capacity Genotyping by Sequencing Analysis Pipeline. *Plos One* 9: 11  
Google Scholar: [Author Only](#) [Title Only](#) [Author and Title](#)
- Goodstein DM, Shu SQ, Howson R, Neupane R, Hayes RD, Fazo J, Mitros T, Dirks W, Hellsten U, Putnam N, Rokhsar DS (2012) *Phytozome: a comparative platform for green plant genomics*. *Nucleic Acids Research* 40: D1178-D1186  
Google Scholar: [Author Only](#) [Title Only](#) [Author and Title](#)
- Grant OM, Chaves MM, Jones HG (2006) Optimizing thermal imaging as a technique for detecting stomatal closure induced by drought stress under greenhouse conditions. *Physiologia Plantarum* 127: 507-518  
Google Scholar: [Author Only](#) [Title Only](#) [Author and Title](#)
- Grant OM, Tronina L, Jones HG, Chaves MM (2007) Exploring thermal imaging variables for the detection of stress responses in grapevine under different irrigation regimes. *Journal of Experimental Botany* 58: 815-825  
Google Scholar: [Author Only](#) [Title Only](#) [Author and Title](#)
- Guillion L, Jones HG, Leinonen I, Lhomme JP (2008) On the relationships between stomatal resistance and leaf temperatures in thermography. *Agricultural and Forest Meteorology* 148: 1908-1912  
Google Scholar: [Author Only](#) [Title Only](#) [Author and Title](#)
- Głowacka K, Kromdijk J, Kucera K, Xie J, Cavanagh AP, Leonelli L, Leakey ADB, Ort DR, Niyogi KK, Long SP (2018) Photosystem II Subunit S overexpression increases the efficiency of water use in a field-grown crop. *Nature Communications* 9: 868  
Google Scholar: [Author Only](#) [Title Only](#) [Author and Title](#)
- Hadebe ST, Modi AT, Mabhaudhi T (2017) Drought Tolerance and Water Use of Cereal Crops: A Focus on Sorghum as a Food Security Crop in Sub-Saharan Africa. *Journal of Agronomy and Crop Science* 203: 177-191  
Google Scholar: [Author Only](#) [Title Only](#) [Author and Title](#)
- Hetherington AM, Woodward FI (2003) The role of stomata in sensing and driving environmental change. *Nature* 424: 901-908  
Google Scholar: [Author Only](#) [Title Only](#) [Author and Title](#)
- Jones HG (1999) Use of infrared thermometry for estimation of stomatal conductance as a possible aid to irrigation scheduling. *Agricultural and Forest Meteorology* 95: 139-149  
Google Scholar: [Author Only](#) [Title Only](#) [Author and Title](#)
- Jones HG, Stoll M, Santos T, de Sousa C, Chaves MM, Grant OM (2002) Use of infrared thermography for monitoring stomatal closure in the field: application to grapevine. *Journal of Experimental Botany* 53: 2249-2260  
Google Scholar: [Author Only](#) [Title Only](#) [Author and Title](#)
- Kaiser E, Morales A, Harbinson J (2018) Fluctuating Light Takes Crop Photosynthesis on a Rollercoaster Ride. *Plant Physiology* 176: 977-989  
Google Scholar: [Author Only](#) [Title Only](#) [Author and Title](#)
- Kaiser E, Morales A, Harbinson J, Kromdijk J, Heuvelink E, Marcelis LFM (2015) Dynamic photosynthesis in different environmental conditions. *Journal of Experimental Botany* 66: 2415-2426



Google Scholar: [Author Only](#) [Title Only](#) [Author and Title](#)

**Kaiser H, Kappen L (2001) Stomatal oscillations at small apertures: indications for a fundamental insufficiency of stomatal feedback-control inherent in the stomatal turgor mechanism. *Journal of Experimental Botany* 52: 1303-1313**

Google Scholar: [Author Only](#) [Title Only](#) [Author and Title](#)

**Kang J, Hwang JU, Lee M, Kim YY, Assmann SM, Martinoia E, Lee Y (2010) PDR-type ABC transporter mediates cellular uptake of the phytohormone abscisic acid. *Proceedings of the National Academy of Sciences of the United States of America* 107: 2355-2360**

Google Scholar: [Author Only](#) [Title Only](#) [Author and Title](#)

**Kerstiens G (1996) Cuticular water permeability and its physiological significance. *Journal of Experimental Botany* 47: 1813-1832**

Google Scholar: [Author Only](#) [Title Only](#) [Author and Title](#)

**Kim CM, Dolan L (2011) Root hair development involves asymmetric cell division in *Brachypodium distachyon* and symmetric division in *Oryza sativa*. *New Phytologist* 192:601-610**

Google Scholar: [Author Only](#) [Title Only](#) [Author and Title](#)

**Klermund C, Ranftl QL, Diener J, Bastakis E, Richter R, Schwechheimer C (2016) LLM-Domain B-GATA Transcription Factors Promote Stomatal Development Downstream of Light Signaling Pathways in *Arabidopsis thaliana* Hypocotyls. *Plant Cell* 28: 646-660**

Google Scholar: [Author Only](#) [Title Only](#) [Author and Title](#)

**Koester RP, Nohl BM, Diers BW, Ainsworth EA (2016) Has photosynthetic capacity increased with 80 years of soybean breeding? An examination of historical soybean cultivars. *Plant Cell and Environment* 39: 1058-1067**

Google Scholar: [Author Only](#) [Title Only](#) [Author and Title](#)

**Kremling KAG, Diepenbrock CH, Gore MA, Buckler ES, Bandillo NB (2019) Transcriptome-Wide Association Supplements Genome-Wide Association in *Zea mays*. *G3-Genes Genomes Genetics* 9: 3023-3033**

Google Scholar: [Author Only](#) [Title Only](#) [Author and Title](#)

**Langmead B, Salzberg SL (2012) Fast gapped-read alignment with Bowtie 2. *Nature Methods* 9: 357-U354**

Google Scholar: [Author Only](#) [Title Only](#) [Author and Title](#)

**Lawson T, Blatt MR (2014) Stomatal Size, Speed, and Responsiveness Impact on Photosynthesis and Water Use Efficiency. *Plant Physiology* 164: 1556-1570**

Google Scholar: [Author Only](#) [Title Only](#) [Author and Title](#)

**Lawson T, Violet-Chabrand S (2019) Speedy stomata, photosynthesis and plant water use efficiency. *New Phytologist* 221: 93-98**

Google Scholar: [Author Only](#) [Title Only](#) [Author and Title](#)

**Lawson T, von Caemmerer S, Baroli I (2011) Photosynthesis and Stomatal Behaviour. In U Luttge, W Beyschlag, B Budel, D Francis, eds, *Progress in Botany* 72, Vol 72. Springer-Verlag Berlin, Berlin, pp 265-304**

Google Scholar: [Author Only](#) [Title Only](#) [Author and Title](#)

**Le J, Liu XG, Yang KZ, Chen XL, Zou JJ, Wang HZ, Wang M, Vanneste S, Morita M, Tasaka M, Ding ZJ, Friml J, Beeckman T, Sack F (2014) Auxin transport and activity regulate stomatal patterning and development. *Nature Communications* 5**

Google Scholar: [Author Only](#) [Title Only](#) [Author and Title](#)

**Leakey ADB, Ferguson JN, Pignon CP, Wu A, Jin Z, Hammer GL, Lobell DB (2019) Water use efficiency as a constraint and target for improving the resilience and productivity of C3 and C4 crops. *Annual Review of Plant Biology* 70: 781-808**

Google Scholar: [Author Only](#) [Title Only](#) [Author and Title](#)

**Liu HJ, Yan JB (2019) Crop genome-wide association study: a harvest of biological relevance. *Plant Journal* 97: 8-18**

Google Scholar: [Author Only](#) [Title Only](#) [Author and Title](#)

**Lobell DB, Burke MB, Tebaldi C, Mastrandrea MD, Falcon WP, Naylor RL (2008) Prioritizing climate change adaptation needs for food security in 2030. *Science* 319: 607-610**

Google Scholar: [Author Only](#) [Title Only](#) [Author and Title](#)

**Lobell DB, Roberts MJ, Schlenker W, Braun N, Little BB, Rejesus RM, Hammer GL (2014) Greater Sensitivity to Drought Accompanies Maize Yield Increase in the US Midwest. *Science* 344: 516-519**

Google Scholar: [Author Only](#) [Title Only](#) [Author and Title](#)

**McAusland L, Davey PA, Kanwal N, Baker NR, Lawson T (2013) A novel system for spatial and temporal imaging of intrinsic plant water use efficiency. *Journal of Experimental Botany* 64: 4993-5007**

Google Scholar: [Author Only](#) [Title Only](#) [Author and Title](#)

**McAusland L, Violet-Chabrand S, Davey P, Baker NR, Brendel O, Lawson T (2016) Effects of kinetics of light-induced stomatal responses on photosynthesis and water-use efficiency. *New Phytologist* 211: 1209-1220**

Google Scholar: [Author Only](#) [Title Only](#) [Author and Title](#)

**McLachlan DH, Lan J, Geilfus CM, Dodd AN, Larson T, Baker A, Horak H, Kollist H, He ZS, Graham I, Mickelbart MV, Hetherington AM (2016) The Breakdown of Stored Triacylglycerols Is Required during Light-Induced Stomatal Opening. *Current Biology* 26: 707-712**

Google Scholar: [Author Only](#) [Title Only](#) [Author and Title](#)

**Medlyn BE, Duursma RA, Eamus D, Ellsworth DS, Prentice IC, Barton CVM, Crous KY, de Angelis P, Freeman M, Wingate L (2011) Reconciling the optimal and empirical approaches to modelling stomatal conductance. *Global Change Biology* 17: 2134-2144**

Google Scholar: [Author Only](#) [Title Only](#) [Author and Title](#)

**Meng XZ, Chen X, Mang HG, Liu CL, Yu X, Gao XQ, Torii KU, He P, Shan LB (2015) Differential Function of Arabidopsis SERK Family Receptor-like Kinases in Stomatal Patterning. *Current Biology* 25: 2361-2372**

Google Scholar: [Author Only](#) [Title Only](#) [Author and Title](#)

**Merlot S, Mustilli AC, Genty B, North H, Lefebvre V, Sotta B, Vavasseur A, Giraudat J (2002) Use of infrared thermal imaging to isolate Arabidopsis mutants defective in stomatal regulation. *Plant Journal* 30: 601-609**

Google Scholar: [Author Only](#) [Title Only](#) [Author and Title](#)

**Mi HY, Muruganujan A, Ebert D, Huang XS, Thomas PD (2019) PANTHER version 14: more genomes, a new PANTHER GO-slim and improvements in enrichment analysis tools. *Nucleic Acids Research* 47: D419-D426**

Google Scholar: [Author Only](#) [Title Only](#) [Author and Title](#)

**Morris GP, Ramu P, Deshpande SP, Hash CT, Shah T, Upadhyaya HD, Riera-Lizarazu O, Brown PJ, Acharya CB, Mitchell SE, Harriman J, Glaubitz JC, Buckler ES, Kresovich S (2013) Population genomic and genome-wide association studies of agroclimatic traits in sorghum. *Proceedings of the National Academy of Sciences of the United States of America* 110: 453-458**

Google Scholar: [Author Only](#) [Title Only](#) [Author and Title](#)

**Ohashi-Ito K, Bergmann DC (2006) Arabidopsis FAMA controls the final proliferation/differentiation switch during stomatal development. *Plant Cell* 18: 2493-2505**

Google Scholar: [Author Only](#) [Title Only](#) [Author and Title](#)

**Ort DR, Long SP (2014) Limits on Yields in the Corn Belt. *Science* 344: 483-484**

Google Scholar: [Author Only](#) [Title Only](#) [Author and Title](#)

**Ortiz D, Hu JY, Fernandez MGS (2017) Genetic architecture of photosynthesis in Sorghum bicolor under non-stress and cold stress conditions. *Journal of Experimental Botany* 68: 4545-4557**

Google Scholar: [Author Only](#) [Title Only](#) [Author and Title](#)

**Papanatsiou M, Petersen J, Henderson L, Wang Y, Christie JM, Blatt MR (2019) Optogenetic manipulation of stomatal kinetics improves carbon assimilation, water use, and growth. *Science* 363: 1456-+**

Google Scholar: [Author Only](#) [Title Only](#) [Author and Title](#)

**Paterson AH, Bowers JE, Bruggmann R, Dubchak I, Grimwood J, Gundlach H, Haberer G, Hellsten U, Mitros T, Poliakov A, Schmutz J, Spannagl M, Tang HB, Wang XY, Wicker T, Bharti AK, Chapman J, Feltus FA, Gowik U, Grigoriev IV, Lyons E, Maher CA, Martis M, Narechania A, Ollillar RP, Penning BW, Salamov AA, Wang Y, Zhang LF, Carpita NC, Freeling M, Gingle AR, Hash CT, Keller B, Klein P, Kresovich S, McCann MC, Ming R, Peterson DG, Mehboob ur R, Ware D, Westhoff P, Mayer KFX, Messing J, Rokhsar DS (2009) The Sorghum bicolor genome and the diversification of grasses. *Nature* 457: 551-556**

Google Scholar: [Author Only](#) [Title Only](#) [Author and Title](#)

**Pearcy RW (1990) Sunflecks and photosynthesis in plant canopies. *Annual Review of Plant Physiology and Plant Molecular Biology* 41: 421-453**

Google Scholar: [Author Only](#) [Title Only](#) [Author and Title](#)

**Pena MJ, Zhong RQ, Zhou GK, Richardson EA, O'Neill MA, Darvill AG, York WS, Ye ZH (2007) Arabidopsis irregular xylem8 and irregular xylem9: Implications for the complexity of glucuronoxylan biosynthesis. *Plant Cell* 19: 549-563**

Google Scholar: [Author Only](#) [Title Only](#) [Author and Title](#)

**Petricka JJ, Clay NK, Nelson TM (2008) Vein patterning screens and the defectively organized tributaries mutants in Arabidopsis thaliana. *Plant Journal* 56: 251-263**

Google Scholar: [Author Only](#) [Title Only](#) [Author and Title](#)

**Pignon CP, Leakey ADB, Long SP, Kromdijk J (2021) Drivers of Natural Variation in Water-Use Efficiency Under Fluctuating Light Are Promising Targets for Improvement in Sorghum. *Frontiers in Plant Science* 12: 13**

Google Scholar: [Author Only](#) [Title Only](#) [Author and Title](#)

**Pillitteri LJ, Dong J (2013) Stomatal development in Arabidopsis. In, Ed e0162. *BioOne, The Arabidopsis book*, p e0162**

Google Scholar: [Author Only](#) [Title Only](#) [Author and Title](#)

**Pnueli L, Liang H, Rozenberg M, Mittler R (2003) Growth suppression, altered stomatal responses, and augmented induction of heat shock proteins in cytosolic ascorbate peroxidase (Apx1)-deficient Arabidopsis plants. *Plant Journal* 34: 187-203**

Google Scholar: [Author Only](#) [Title Only](#) [Author and Title](#)

**Portis AR (2003) Rubisco activase - Rubisco's catalytic chaperone. *Photosynthesis Research* 75: 11-27**

Google Scholar: [Author Only](#) [Title Only](#) [Author and Title](#)

**R Core Team (2017) R: A language and environment for statistical computing., R Foundation for Statistical Computing, Vienna, Australia**

**Raissig MT, Abrash E, Bettadapur A, Vogel JP, Bergmann DC (2016) Grasses use an alternatively wired bHLH transcription factor network to establish stomatal identity. *Proceedings of the National Academy of Sciences of the United States of America* 113: 8326-8331**

Google Scholar: [Author Only](#) [Title Only](#) [Author and Title](#)

- Ray DK, Mueller ND, West PC, Foley JA (2013) Yield Trends Are Insufficient to Double Global Crop Production by 2050. Plos One 8: 8**  
Google Scholar: [Author Only](#) [Title Only](#) [Author and Title](#)
- Regassa TH, Wortmann CS (2014) Sweet sorghum as a bioenergy crop: Literature review. Biomass & Bioenergy 64: 348-355**  
Google Scholar: [Author Only](#) [Title Only](#) [Author and Title](#)
- Remm M, Storm CEV, Sonnhammer ELL (2001) Automatic clustering of orthologs and in-paralogs from pairwise species comparisons. Journal of Molecular Biology 314: 1041-1052**  
Google Scholar: [Author Only](#) [Title Only](#) [Author and Title](#)
- Sack L, Cowan PD, Jaikumar N, Holbrook NM (2003) The 'hydrology' of leaves: co-ordination of structure and function in temperate woody species. Plant Cell and Environment 26: 1343-1356**  
Google Scholar: [Author Only](#) [Title Only](#) [Author and Title](#)
- Serna L (2011) Stomatal development in Arabidopsis and grasses: differences and commonalities. International Journal of Developmental Biology 55: 5-10**  
Google Scholar: [Author Only](#) [Title Only](#) [Author and Title](#)
- Shimazaki K, Doi M, Assmann SM, Kinoshita T (2007) Light regulation of stomatal movement. Annual Review of Plant Biology 58: 219-247**  
Google Scholar: [Author Only](#) [Title Only](#) [Author and Title](#)
- Sierla M, Waszczak C, Vahisalu T, Kangasjarvi J (2016) Reactive Oxygen Species in the Regulation of Stomatal Movements. Plant Physiology 171: 1569-1580**  
Google Scholar: [Author Only](#) [Title Only](#) [Author and Title](#)
- Sinclair TR, Tanner CB, Bennett JM (1984) Water-use efficiency in crop production. Bioscience 34: 36-40**  
Google Scholar: [Author Only](#) [Title Only](#) [Author and Title](#)
- Soleh MA, Tanaka Y, Nomoto Y, Iwahashi Y, Nakashima K, Fukuda Y, Long SP, Shiraiwa T (2016) Factors underlying genotypic differences in the induction of photosynthesis in soybean Glycine max (L.) Merr. Plant Cell and Environment 39: 685-693**  
Google Scholar: [Author Only](#) [Title Only](#) [Author and Title](#)
- Stegle O, Parts L, Durbin R, Winn J (2010) A Bayesian Framework to Account for Complex Non-Genetic Factors in Gene Expression Levels Greatly Increases Power in eQTL Studies. Plos Computational Biology 6: 11**  
Google Scholar: [Author Only](#) [Title Only](#) [Author and Title](#)
- Takahashi S, Monda K, Negi J, Konishi F, Ishikawa S, Hashimoto-Sugimoto M, Goto N, Iba K (2015) Natural Variation in Stomatal Responses to Environmental Changes among Arabidopsis thaliana Ecotypes. Plos One 10: 13**  
Google Scholar: [Author Only](#) [Title Only](#) [Author and Title](#)
- Tam V, Patel N, Turcotte M, Bosse Y, Pare G, Meyre D (2019) Benefits and limitations of genome-wide association studies. Nature Reviews Genetics 20: 467-484**  
Google Scholar: [Author Only](#) [Title Only](#) [Author and Title](#)
- Taylor SH, Hulme SP, Rees M, Ripley BS, Woodward FI, Osborne CP (2010) Ecophysiological traits in C3 and C4 grasses: a phylogenetically controlled screening experiment. New Phytologist 185: 780-791**  
Google Scholar: [Author Only](#) [Title Only](#) [Author and Title](#)
- Valluru R, Gazave EE, Fernandes SB, Ferguson JN, Lozano R, Hirannaiah P, Zuo T, Brown PJ, Leakey ADB, Gore MA, Buckler ES, Bandillo N (2019) Deleterious Mutation Burden and Its Association with Complex Traits in Sorghum (Sorghum bicolor). Genetics 211: 1075-1087**  
Google Scholar: [Author Only](#) [Title Only](#) [Author and Title](#)
- Vialet-Chabrand S, Lawson T (2019) Dynamic leaf energy balance: deriving stomatal conductance from thermal imaging in a dynamic environment. Journal of Experimental Botany 70: 2839-2855**  
Google Scholar: [Author Only](#) [Title Only](#) [Author and Title](#)
- Vico G, Manzoni S, Palmroth S, Katul G (2011) Effects of stomatal delays on the economics of leaf gas exchange under intermittent light regimes. New Phytologist 192: 640-652**  
Google Scholar: [Author Only](#) [Title Only](#) [Author and Title](#)
- von Caemmerer S, Farquhar GD (1981) Some relationships between the biochemistry of photosynthesis and the gas exchange of leaves. Planta 153: 376-387**  
Google Scholar: [Author Only](#) [Title Only](#) [Author and Title](#)
- Waduware-Jayabahu I, Oppermann Y, Wirtz M, Hull ZT, Schoor S, Plotnikov AN, Hell R, Sauter M, Moffatt BA (2012) Recycling of Methylthioadenosine Is Essential for Normal Vascular Development and Reproduction in Arabidopsis. Plant Physiology 158: 1728-1744**  
Google Scholar: [Author Only](#) [Title Only](#) [Author and Title](#)
- Wang Y, Burgess SJ, de Becker EM, Long SHP (2020) Photosynthesis in the fleeting shadows: an overlooked opportunity for increasing crop productivity? Plant Journal 101: 874-884**  
Google Scholar: [Author Only](#) [Title Only](#) [Author and Title](#)

- Wang YH, Xue XY, Zhu JK, Dong J (2016) Demethylation of ERECTA receptor genes by IBM1 histone demethylase affects stomatal development. *Development* 143: 4452-4461**  
Google Scholar: [Author Only](#) [Title Only](#) [Author and Title](#)
- Way DA, Pearcy RW (2012) Sunflecks in trees and forests: from photosynthetic physiology to global change biology. *Tree Physiology* 32: 1066-1081**  
Google Scholar: [Author Only](#) [Title Only](#) [Author and Title](#)
- Wei T, Simko V (2017) R package "corrplot": Visualization of a Correlation Matrix. In,**  
Google Scholar: [Author Only](#) [Title Only](#) [Author and Title](#)
- Wong SC, Cowan IR, Farquhar GD (1979) Stomatal conductance correlates with photosynthetic capacity. *Nature* 282: 424-426**  
Google Scholar: [Author Only](#) [Title Only](#) [Author and Title](#)
- WWAP (2015) The United Nations world water development report 2015: Water for a sustainable world. In. UNESCO, Paris**  
Google Scholar: [Author Only](#) [Title Only](#) [Author and Title](#)
- Xie J, Mayfield-Jones D, Erice G, Choi M, Leakey ADB (2020) Optical topometry and machine learning to rapidly phenotype stomatal patterning traits for QTL mapping in maize. *BioRxiv* <https://www.biorxiv.org/content/10.1101/2020.10.09.333880v1>**  
Google Scholar: [Author Only](#) [Title Only](#) [Author and Title](#)
- Yu HY, Murchie EH, Gonzalez-Carranza ZH, Pyke KA, Roberts JA (2015) Decreased photosynthesis in the erect panicle 3 (ep3) mutant of rice is associated with reduced stomatal conductance and attenuated guard cell development. *Journal of Experimental Botany* 66: 1543-1552**  
Google Scholar: [Author Only](#) [Title Only](#) [Author and Title](#)
- Zhang YY, Zhu HY, Zhang Q, Li MY, Yan M, Wang R, Wang LL, Welti R, Zhang WH, Wang XM (2009) Phospholipase D alpha 1 and Phosphatidic Acid Regulate NADPH Oxidase Activity and Production of Reactive Oxygen Species in ABA-Mediated Stomatal Closure in *Arabidopsis*. *Plant Cell* 21: 2357-2377**  
Google Scholar: [Author Only](#) [Title Only](#) [Author and Title](#)
- Zhou X, Stephens M (2012) Genome-wide efficient mixed-model analysis for association studies. *Nature Genetics* 44: 821-U136**  
Google Scholar: [Author Only](#) [Title Only](#) [Author and Title](#)
- Zhou X, Stephens M (2014) Efficient multivariate linear mixed model algorithms for genome-wide association studies. *Nature Methods* 11: 407-+**  
Google Scholar: [Author Only](#) [Title Only](#) [Author and Title](#)
- Zhou XY, Huang XH (2019) Genome-wide Association Studies in Rice: How to Solve the Low Power Problems? *Molecular Plant* 12: 10-12**  
Google Scholar: [Author Only](#) [Title Only](#) [Author and Title](#)
- Zhu XG, Ort DR, Whitmarsh J, Long SP (2004) The slow reversibility of photosystem II thermal energy dissipation on transfer from high to low light may cause large losses in carbon gain by crop canopies: a theoretical analysis. *Journal of Experimental Botany* 55: 1167-1175**  
Google Scholar: [Author Only](#) [Title Only](#) [Author and Title](#)
